# 1 Evolution of brain ontogenetic growth under ecological 2 challenges

3 Mauricio González-Forero<sup>1\*</sup>, Timm Faulwasser<sup>2†</sup>, and Laurent Lehmann<sup>1‡</sup>

4 <sup>1</sup>Department of Ecology and Evolution, University of Lausanne, CH-1015 Lausanne, Switzerland

5 <sup>2</sup>Laboratoire d'Automatique, École Polytechnique Fédérale de Lausanne, CH-1015 Lausanne, Switzerland,  
6 and Institute for Applied Computer Science, Karlsruhe Institute of Technology, 76344  
7 Eggenstein-Leopoldshafen, Germany

8 \*Mauricio.GonzalezForero@unil.ch, †Timm.Faulwasser@epfl.ch, ‡Laurent.Lehmann@unil.ch.

## 9 Abstract

10 Large brains are metabolically expensive but support skills (or cognitive abilities, knowledge,  
11 information, etc.) that allow overcoming ecological and social challenges, with social challenges  
12 being thought to strongly promote large-brain evolution by causing evolutionary arms races in  
13 cognition yielding exaggerated brain sizes. We formulate a mathematical model that yields quan-  
14 titative predictions of brain and body mass throughout ontogeny when individuals evolve facing  
15 ecological but no social challenges. We find that ecological challenges alone can generate adult  
16 brain and body mass of ancient human scale, showing that evolutionary arms races in cognition  
17 are not necessary for extreme brain sizes. We show that large brains are favored by intermediately  
18 challenging ecological environments where skills are moderately effective and metabolically ex-  
19 pensive for the brain to maintain. We further show that observed correlations of cognitive abili-  
20 ties and brain mass can result from saturation with skill maintenance of the brain metabolic rate  
21 allocated to skills.

## 22 Introduction

23 Large brains use copious amounts of resources that could otherwise be allocated to reproductive  
24 function (Aiello and Wheeler, 1995, Mink *et al.*, 1981, Kuzawa *et al.*, 2014). Large brains can, how-  
25 ever, support complex cognition giving rise to abilities such as creativity, expertise, intelligence, lan-  
26 guage, consciousness, self control, and predicting the thoughts of others (theory of mind) (Stern-  
27 berg and Ben-Zeev, 2001, Shettleworth, 2010, MacLean *et al.*, 2014, Heyes and Frith, 2014). Large  
28 brains may thus entail sizable benefits in reproductive success by providing the individual with skills  
29 (or cognitive abilities, knowledge, information, etc.) to overcome ecological and social challenges.  
30 For instance, brain-generated skills may allow overcoming ecological challenges such as obtaining  
31 nutritionally rich but relatively inaccessible food (Seyfarth and Cheney, 2002, Milton, 1981, Clutton-  
32 Brock and Harvey, 1980, Barton, 1999, Kaplan *et al.*, 2000, Kaplan and Robson, 2002, Wrangham,  
33 2009). Additionally, brain-generated skills may allow overcoming social challenges such as coordi-  
34 nating with or out-competing social partners, for example to hunt big game or ascend the social  
35 hierarchy (Humphrey, 1976, Byrne and Whiten, 1988, de Waal, 1998, Dunbar and Shultz, 2007). An  
36 important aspect of social challenges is that they can involve conflicts of interest among social part-  
37 ners, which may promote evolutionary arms races in cognition, possibly leading to exaggerated brain  
38 sizes (Humphrey, 1976, Byrne and Whiten, 1988, de Waal, 1998, Dunbar and Shultz, 2007, McNally  
39 and Jackson, 2013, Arbilly *et al.*, 2014). Yet, regardless of the selective forces for large brains, the en-  
40 ergy needed to support them must be available in order to meet their substantial energetic demands  
41 (Aiello and Wheeler, 1995, Isler and van Schaik, 2006).

42 Ecological and social challenge hypotheses are often assessed by means of correlations between  
43 ecological or social variables with measurements of cognitive abilities or proxies thereof (Clutton-  
44 Brock and Harvey, 1980, Barton, 1999, Dunbar and Shultz, 2007, Dunbar, 1998, Fish and Lockwood,  
45 2003, Taylor and van Schaik, 2007, MacLean *et al.*, 2009, Allen and Kay, 2012, MacLean *et al.*, 2014,  
46 Shettleworth, 2010, MacLean *et al.*, 2013, Benson-Amram *et al.*, 2016). For instance, in primates, diet  
47 breath correlates with self control (MacLean *et al.*, 2014) and group size correlates with neocortex ra-  
48 tio (Dunbar and Shultz, 2007); yet, diet quality has failed to correlate with endocranial volume in New  
49 World monkeys (Allen and Kay, 2012) and group size has failed to correlate with problem-solving  
50 ability in mammalian carnivores (Benson-Amram *et al.*, 2016). Ecological and social challenge hy-  
51 potheses have also been evaluated with functional studies. For example, in humans, behavioral  
52 experiments have found refined cognitive skills for social rather than general (ecological) function  
53 (Herrmann *et al.*, 2007, Cosmides *et al.*, 2010), and brain imaging has identified various brain regions  
54 specialized for social interaction (Amodio and Frith, 2006, Frith, 2007). Recently, studies have more  
55 directly addressed the causes for large-brain evolution via phylogenetic analyses, artificial selection

56 experiments, and genomic patterns of selection (Pérez-Barbería *et al.*, 2007, Finarelli and Flynn, 2009,  
57 Babbitt *et al.*, 2010, Kotrschal *et al.*, 2013, Mathieson *et al.*, 2015). However, there is a need of testable  
58 mathematical theory guiding causal understanding of the relative contribution of ecological and so-  
59 cial challenges to large-brain evolution (Healy and Rowe, 2007, Jones, 2015).

60 Here we study the possible causal contribution of ecological challenges alone to large-brain evo-  
61 lution by means of a mathematical model. We formulate a metabolically explicit model for the evo-  
62 lution of brain ontogenetic growth when individuals face ecological but no social challenges. We use  
63 the model to determine how much energy should be allocated to brain growth at each age as a re-  
64 sult of natural selection given that overcoming ecological challenges provides energetic returns (e.g.,  
65 through food procurement). By excluding social challenges, the model deliberately eliminates the  
66 possibilities of evolutionary arms races in allocation to brain growth, and thus serves as a baseline  
67 for understanding brain growth evolution. We derive the model in terms of measurable parame-  
68 ters using the approach of West *et al.* (2001). In particular, the model incorporates parameters mea-  
69 suring the mass-specific metabolic costs of brain growth and maintenance, which capture the rela-  
70 tively large metabolic expense of the brain. These parameters can be measured empirically, and are  
71 likely to differ among species given different brain structures and efficiencies. Once parameterized  
72 with values obtained from data, the model yields quantitative predictions for brain and body mass  
73 throughout ontogeny under the assumption that individuals evolved under ecological challenges  
74 alone.

75 A defining feature of the model is that it assumes that some of the brain's energetic consumption  
76 is due to acquisition and maintenance of skills (or cognitive abilities, knowledge, information, etc.).  
77 In particular, we focus on skills that allow extracting energy from the environment (Schniter *et al.*,  
78 2015). Our approach builds on previous models considering brain (physical embodied capital) and  
79 skill (functional embodied capital) as part of the individual's embodied capital invested in fitness  
80 (Kaplan and Robson, 2002). It also accounts for the notion that information gained and maintained  
81 by the brain during ontogeny should be explicitly considered when attempting to understand brain  
82 evolution (Boyd and Richerson, 1985, Shettleworth, 2010, van Schaik and Burkart, 2011). Then, given  
83 that the brain consumes energy to gain and maintain skills, our model allows to predict how much  
84 an individual should grow its brain to obtain the energetic returns from skills. By feeding the model  
85 with parameter values for modern humans (i.e., *Homo sapiens*), we find that the model can correctly  
86 predict various major modern human life history stages as well as adult body and brain mass of an-  
87 cient human scale (i.e., of late *Homo erectus* and Neanderthals). These findings show that ecological  
88 challenges alone can generate extreme brain sizes despite the absence of evolutionary arms races in  
89 cognition.

## 90 **Model description**

91 We consider a population with overlapping generations and measure the age of individuals in contin-  
92 uous time (Charlesworth, 1980). To keep the model tractable, we assume random mating, constant  
93 population size, and constant environment. We focus on females throughout and assume that at  
94 each age, each individual faces ecological challenges of energy extraction from the non-social envi-  
95 ronment (e.g., cracking a nut, hunting-gathering, or lighting a fire to cook). We assume that some  
96 of the energetic consumption of the brain is due to acquisition (learning) and maintenance (mem-  
97 ory) of energy-extraction skills. We assume that each individual uses the energy-extraction skills it  
98 has at a given age to extract energy. In accordance with our aim of building a model without social  
99 challenges, we further assume that energy extraction is done individually, but is facilitated early in  
100 life by parental or alloparental care. For simplicity, we assume that (allo)parental care has fertility  
101 but no survival costs. The individual can use the energy extracted in growth, maintenance, and re-  
102 production. We define growth metabolic rate as the heat released due to body growth by the resting  
103 individual per unit time at each age. We further define a tissue's growth schedule as the fraction of  
104 growth metabolic rate due to the growth of that tissue. We let growth schedules be evolvable traits,  
105 and by making further standard life history assumptions (Mylius and Dieckmann, 1995, Dieckmann  
106 *et al.*, 2006), we identify evolutionarily stable growth schedules (ESGS) for each tissue by using opti-  
107 mal control theory.

## 108 **Energy and mass**

109 We partition the mass of an individual into three types of tissues: brain tissue, reproductive tissue,  
110 and the remainder which we refer to as somatic tissue. The mass of tissue  $i$  of a representative indi-  
111 vidual at age  $a$  is  $x_i(a)$ , and we use  $i \in \{b, r, s\}$  for brain, reproductive, and somatic tissue, respectively.  
112 The resting metabolic rate of the individual at age  $a$  is  $B_{\text{rest}}(a)$ , which is the heat released by the  
113 resting individual per unit time at age  $a$ . An average mass unit of tissue  $i$  of the resting individual  
114 releases an amount of heat  $B_i$  per unit time, which for simplicity we assume constant with respect  
115 to age. Hence, the maintenance metabolic rate at age  $a$ , which is the heat released by the resting  
116 individual per unit time for maintaining its existing mass, is  $B_{\text{maint}}(a) = \sum_{i \in \{b, r, s\}} x_i(a) B_i$ . Then, the  
117 growth metabolic rate is  $B_{\text{rest}}(a) - B_{\text{maint}}(a)$ , which gives the amount of heat released by the resting  
118 individual per unit time for producing new tissue. The fraction of the growth metabolic rate allocated  
119 to tissue  $i$  at age  $a$  is the tissue's growth schedule  $u_i(a)$ . We ask what is the growth schedule of each  
120 tissue at each age as a result of natural selection, so we take the growth schedules  $u_i(a)$  of the three  
121 tissues as the evolvable traits.

122 Producing an average mass unit of tissue  $i$  releases as heat an amount of energy  $E_i$ , which for

123 simplicity we also assume constant with respect to age. Building on the metabolic model of West  
124 *et al.* (2001), we show in the Supporting Information (SI, §1.1–1.3) that the growth rate of the mass of  
125 tissue  $i \in \{\mathbf{b}, \mathbf{r}, \mathbf{s}\}$  is

$$\dot{x}_i(a) = u_i(a) \left( \frac{B_{\text{rest}}(a) - B_{\text{maint}}(a)}{E_i} \right), \quad (1)$$

126 where  $\dot{x}_i(a)$  denotes the derivative of  $x_i(a)$  with respect to age. Equation (1) is a general equation  
127 describing how growth schedules  $u_i(a)$  specify tissue growth rates.

## 128 Skill

129 We let the individual have a number  $x_k(a)$  of energy-extraction skills at age  $a$ . We assume that a frac-  
130 tion  $v_k$  of the brain metabolic rate is due to the energetic expense incurred by the brain for acquiring  
131 (learning) and maintaining (memory) energy-extraction skills. We also assume that the brain releases  
132 as heat an amount of energy  $E_k$  for gaining an average skill (learning cost) and an amount  $B_k$  per unit  
133 time for maintaining an average skill (memory cost). We also assume  $v_k$ ,  $E_k$ , and  $B_k$  to be constant.  
134 The growth rate of energy-extraction skills (see SI §1.4 for derivation) is then

$$\dot{x}_k(a) = \frac{v_k M_{\text{brain}}(a) - x_k(a) B_k}{E_k}, \quad (2)$$

135 where

$$M_{\text{brain}}(a) = x_b(a) B_b + \dot{x}_b(a) E_b \quad (3)$$

136 is the brain metabolic rate at age  $a$  (i.e., the energy released as heat by the brain per unit time with  
137 the individual at rest) which consists of the heat released for brain tissue maintenance [ $x_b(a) B_b$ ] and  
138 growth [ $\dot{x}_b(a) E_b$ ]. Equation (2) is also a general equation capturing the link of brain with skill; it is  
139 general in that, for example, (2) is not restricted to energy-extraction skills (given that  $v_k$  is accord-  
140 ingly reinterpreted). In analogy with (1), the first term in the numerator of (2) gives the heat released  
141 due to energetic input for skill growth whereas the second term gives the heat released for skill main-  
142 tenance.

## 143 Skill function

144 Finally, we specify how skills allow for energy extraction. We denote the probability of energy extrac-  
145 tion at age  $a$  as  $p(x_k(a))$ , defined as the ratio of the amount of energy extracted per unit time at age  
146  $a$  over that extracted if the individual is maximally successful at energy extraction. We assume that  
147  $p(x_k(a))$  depends on skill number but is independent of body mass. Given the empirical relationship  
148 of resting metabolic rate and body mass as a power law (Kleiber, 1961, Peters, 1983, Sears *et al.*, 2012),  
149 which for humans also holds ontogenetically to a good approximation (Fig. S4), we show in the SI

150 (§1.5) that resting metabolic rate takes the form

$$B_{\text{rest}}(a) = K p(x_k(a)) x_T(a)^\beta, \quad (4)$$

151 where  $\beta$  is a scaling coefficient,  $K$  is a constant independent of body mass, and body mass is  $x_T(a) =$   
152  $\sum_{i \in \{b, r, s\}} x_i(a)$ . Equation (4) captures the notion that energy extraction gives the individual energy  
153 that it can use to grow or maintain its different tissues.

154 We consider energy extraction at age  $a$  as a contest against the environment. We thus let the  
155 probability of energy extraction  $p(x_k(a))$  take the form of a contest success function (Hirshleifer,  
156 1995, Skaperdas, 1996):

$$p(x_k(a)) = \frac{c(x_k(a))}{d(a) + c(x_k(a))}, \quad (5)$$

157 which we assume increases with the number  $x_k(a)$  of energy-extraction skills, and depends on two  
158 terms. First, the probability of energy extraction depends on the difficulty of energy-extraction at age  
159  $a$ , measured by  $d(a)$ . Thus, the higher  $d(a)$ , the more challenging energy extraction is and the more  
160 energy-extraction skills the individual must have to obtain resources. We let  $d(a) = \alpha - \varphi(a)$ , where  $\alpha$   
161 is the environmental difficulty and  $\varphi(a)$  is the facilitation of energy-extraction due to (allo)parental  
162 care. We let this facilitation be an exponentially decreasing function with age,  $\varphi(a) = \varphi_0 e^{-\varphi_1 a}$ , and  
163 we ignore the increased resting metabolic rate caused by gestation and lactation (Pontzer, 2015).

164 Second, the probability of energy extraction depends on the individual's competence at energy  
165 extraction, denoted by  $c(x_k(a))$ . We consider two cases that are standard in contest models: (1) a  
166 power function  $c_1(x_k(a)) = (x_k(a))^\gamma$ , so the probability of energy extraction  $p(x_k(a))$  is a contest suc-  
167 cess function in ratio form (power competence); and (2) an exponential function  $c_2(x_k(a)) = (e^{x_k(a)})^\gamma$   
168 so the probability of energy extraction is in difference form (exponential competence) (Hirshleifer,  
169 1995, Skaperdas, 1996). In both cases, the parameter  $\gamma$  describes the effectiveness of skills at energy  
170 extraction. Thus, with  $\gamma = 0$ , skills are ineffective while with increasing  $\gamma$  fewer skills are needed to  
171 extract energy. In general, competence  $c(x_k(a))$  represents features of the individual (e.g., how in-  
172 creasing skill changes efficiency in information processing by the brain), and of the environment  
173 (e.g., how adding the skill of caching nuts to that of cracking nuts changes energy extraction effi-  
174 ciency). For a given skill effectiveness ( $\gamma$ ), exponential competence assumes a steeper increase in  
175 competence with increasing skill number than power competence.

## 176 Evolutionary invasion analysis

177 Under standard life history assumptions, if an evolutionary equilibrium is reached, natural selection  
178 maintains the population at this equilibrium where evolutionarily stable growth schedules (ESGS)  
179 maximize the individual's lifetime number of offspring assuming that population density is regu-  
180 lated through fertility (Mylius and Dieckmann, 1995, Dieckmann *et al.*, 2006, see also Lande, 1982).

181 Using equations (1)–(5), we seek the ESGS, denoted by  $u_i^*(a)$ , which yield the optimal tissue mass  
182 denoted by  $x_i^*(a)$ . With this aim, we obtain the ESGS by solving this maximization problem, for  
183 which we employ optimal control theory (SI §2-4) and the software GPOPS (Patterson and Rao, 2014)  
184 for numerical solutions. For simplicity, we assume that mortality is constant, and so the brain only  
185 affects fitness through fertility. Assuming that part of the heat released by reproductive tissue is due  
186 to offspring cell production and that (allo)parental care only entails fertility costs, we let fertility be  
187 proportional to the mass of reproductive tissue (see SI §1.6 and Chang *et al.*, 1998).

188 The model depends on 21 parameters that affect the ESGS, and they measure (P1) tissue mass in  
189 the newborn, (P2) tissue metabolism (i.e., metabolic costs of tissue maintenance and growth), (P3)  
190 demography, (P4) skill of the newborn, (P5) skill metabolism (i.e., metabolic costs of memory and  
191 learning), (P6) (allo)parental care, and (P7) contest success (SI §5). We use published data for mod-  
192 ern human females to estimate 13 parameters that affect the ESGS that are readily estimated from  
193 available data (P1-P3) (SI §5,6; Table S2). These parameters include the brain and body metabolic  
194 costs, and with these parameters fixed, the model can only generate a vastly narrower set of out-  
195 comes. The remaining 8 parameters (P4-P7) are not readily estimated from available data, so for  
196 them we identify by trial-and-error benchmark values that yield a model output in agreement with  
197 observed body and brain mass data for modern human females. The benchmark values are thus dif-  
198 ferent with power (Table S3) and exponential (Table S4) competence. We first present the numerical  
199 results for the two sets of benchmark parameter values and then the results when these benchmark  
200 parameter values vary (see SI for further details and computer code).

## 201 **Results**

### 202 **Predicted life history stages: childhood, adolescence, and adulthood**

203 The resulting ESGS divide the individual's lifespan in three broad stages: (1) a “childhood” stage,  
204 defined as the stage lasting from birth to  $a_m$  years of age and during which allocation to growth  
205 of reproductive tissue is zero; (2) an “adolescence” stage, defined as the stage lasting from  $a_m$  to  $a_a$   
206 years of age and during which there is simultaneous allocation to growth of somatic and reproductive  
207 tissue; and (3) an “adulthood” stage, defined as the stage lasting from  $a_a$  to the end of the individual's  
208 reproductive career and during which all growth allocation is to reproductive tissue (Fig. 1a). These  
209 life stages are obtained with either power or exponential competence (Fig. 1a,e). Note that the ages  
210 at “menarche”  $a_m$  and adulthood  $a_a$  are not parameters but an output of the model.

211 The obtained childhood stage, which is the only stage where there is brain growth, is further sub-  
212 divided in three periods: (1a) “early childhood”, defined here as the earliest childhood period with



213 pure allocation to somatic growth; (1b) “mid childhood”, defined here as the childhood period where  
214 there is simultaneous allocation to somatic and brain growth; and (1c) “preadolescence”, defined  
215 here as the latest childhood period of pure somatic growth. Hence, brain growth occurs exclusively  
216 during “mid childhood”. This result disagrees with observation as the obtained absence of allocation  
217 to brain growth during early childhood does not occur in humans. This discrepancy may be an in-  
218 accuracy arising because the approximation of resting metabolic rate by a power law of body mass  
219 which we use in the model (West *et al.*, 2001) underestimates resting metabolic rate, and thus growth  
220 metabolic rate, during early childhood (Fig. S4). The period we refer to here as mid childhood then  
221 lasts from the obtained age  $a_{b0}$  of brain growth onset to the obtained age  $a_b$  of brain growth arrest  
222 (Fig. 1a).

223 With the exception of the age of brain growth onset, the predicted timing of childhood, ado-  
224 lescence, and adulthood closely follows that observed in modern humans with competence being  
225 either a power or an exponential function of skill number (Table 1). Note that measurement units  
226 (i.e., years, kg, and MJ), excepting skill units, are not arbitrary as they result from the units of the  
227 parameter values estimated from empirical data (Table S2). Hence, the model correctly predicts ma-  
228 jor stages of human life history with accurate timing, with the exception of brain growth allocation  
229 during early childhood (Table 1).

### 230 **Body and brain mass through ontogeny**

231 The ESGS generate the following predicted body and brain mass throughout ontogeny. For total body  
232 mass, there is fast growth during early childhood, followed by slow growth during mid childhood, a  
233 growth spurt during preadolescence, slow growth during adolescence, and no growth during adult-  
234 hood, all closely following the observed pattern (Fig. 1b). The slow growth during mid childhood re-  
235 sults from the simultaneous allocation to somatic and brain growth and from the decreasing growth  
236 metabolic rate due to the increasing energetic costs of brain maintenance (Fig. 1c). The growth spurt  
237 during adolescence arises because (1) all growth metabolic rate is allocated to inexpensive somatic  
238 growth, and (2) growth metabolic rate increases due to increased metabolic rate caused by increas-  
239 ing, inexpensive-to-maintain somatic mass (Fig. 1c). The slow growth during adolescence is due  
240 to simultaneous somatic and reproductive growth, and to the elevated costs of reproductive tissue  
241 maintenance (Fig. 1c). These growth patterns result in two major peaks in growth metabolic rate  
242 (Fig. 1c). While the first peak in growth metabolic rate is made possible by (allo)parental care, the  
243 second peak is made possible by the individual’s own skills (Fig. S7d). After the onset of adulthood  
244 at  $a_a$ , growth metabolic rate is virtually depleted and allocation to growth has essentially no effect on  
245 tissue growth (Fig. 1c).



246 Whereas predicted body growth patterns are qualitatively similar with either power or exponen-  
247 tial competence, they differ quantitatively (Fig. 1b,f). With power competence, the predicted body  
248 mass is quantitatively nearly identical to that observed in modern humans throughout life (Fig. 1b).  
249 In contrast, with exponential competence, the predicted body mass is larger throughout life than that  
250 of modern human females (Fig. 1f).

251 Regarding brain mass, the model predicts it to have the following growth pattern. During early  
252 childhood, brain mass remains static, in contrast to the observed pattern (Fig. 1d). During mid  
253 childhood, brain mass initially grows quickly, then it slows down slightly, and finally grows quickly  
254 again before brain growth arrest at the onset of preadolescence (Fig. 1d). Predicted brain growth is  
255 thus delayed by the obtained early-childhood period relative to the observed brain growth in modern  
256 humans (Fig. 1d). As previously stated, this delay in predicted brain growth may be an inaccuracy  
257 arising from the underestimation of resting metabolic rate during early childhood by the power law  
258 of body mass.

259 Predicted brain growth patterns are also qualitatively similar but quantitatively different with  
260 power and exponential competence (Fig. 1d,h). Adult brain mass is predicted to be smaller or larger  
261 than that observed in modern human females depending on whether competence is respectively a  
262 power or an exponential function (Fig. 1d,h). Remarkably, considering body and brain mass together,  
263 the predicted adult body and brain mass can match those observed in late *H. erectus* if competence  
264 is a power function (Fig. 1b,d). In contrast, the predicted adult body and brain mass can match those  
265 of Neanderthals if competence is an exponential function (Fig. 1f,h). Consequently, the encephaliza-  
266 tion quotient (EQ, which is the ratio of observed adult brain mass over expected adult brain mass for  
267 a given body mass) is larger with exponential competence for the parameter values used (Table 1).

## 268 **Skills through ontogeny**

269 The obtained ESGS predict the following patterns for energy-extraction skills throughout ontogeny.  
270 For the scenario in Fig. 1, the individual gains most skills during childhood and adolescence, skill  
271 number continues to increase after brain growth arrest, and skill number plateaus in adulthood (Fig.  
272 2). That is, skill growth is determinate, in agreement with empirical observations (Fig. 2). Yet, if mem-  
273 ory cost  $B_k$  is substantially lower, skill number can continue to increase throughout the individual's  
274 reproductive career (i.e., skill growth is then indeterminate; Fig. S8e) [see equation (2)]. Neverthe-  
275 less, in that case, the agreement between predicted and observed body and brain mass throughout  
276 ontogeny is substantially reduced (Fig. S8b,c).

277 When skill growth is determinate, the model predicts adult skill number to be proportional to  
278 adult brain mass. In particular, with determinate skill growth, the number of skills that is asymptoti-

279 cally achieved [from equation (2) setting  $\dot{x}_k(a) = 0$  and  $u_b^*(a) = 0$ ] is

$$\hat{x}_k = v_k \frac{B_b}{B_k} x_b^*(a_a), \quad (6)$$

280 where  $\hat{x}_k$  is the asymptotic skill number,  $x_b^*(a_a)$  is the adult brain mass,  $v_k$  is the fraction of brain  
281 metabolic rate allocated to energy-extraction skills, and  $B_b$  is the brain mass-specific maintenance  
282 cost. The requirement for skill growth to be determinate is that the brain metabolic rate allocated  
283 to skills [ $v_k M_{\text{brain}}(a)$ ] becomes saturated with skill maintenance [ $x_k(a) B_k$ ] within the individual's  
284 reproductive career [equation (2)]. Hence, adult skill number is proportional to adult brain mass  
285 in the model because of saturation with skill maintenance of the brain metabolic rate allocated to  
286 skills and because adult brain metabolic rate is found to be proportional to adult brain mass [setting  
287  $\dot{x}_b(a_a) = 0$  in equation (3) yields  $M_{\text{brain}}(a_a) = x_b(a_a) B_b$ ]. Weak correlations between cognitive ability  
288 and brain mass have been identified across taxa including humans (Andreasen *et al.*, 1993, Deaner  
289 *et al.*, 2007, MacLean *et al.*, 2014, Pietschniga *et al.*, 2015, Benson-Amram *et al.*, 2016). Since skills  
290 are here broadly understood to include cognitive abilities (provided parameters are suitably rein-  
291 terpreted), this result provides an explanation for these correlations in terms of saturation of brain  
292 metabolic rate with skill (cognitive ability) maintenance.

293 We now vary parameter values to assess what factors favor a large brain at adulthood.

### 294 **A large brain is favored by intermediate environmental difficulty, moderate skill effec-** 295 **tiveness, and costly memory**

296 A larger adult brain mass is favored by an increasingly challenging environment [increasing  $\alpha$ ; equa-  
297 tion (5)], but is *disfavored* by an exceedingly challenging environment (Fig. 3a). Environmental dif-  
298 ficulty favors a larger brain because more skills are needed for energy extraction [equation (5)], and  
299 from equation (2) more skills can be gained by increasing brain metabolic rate in turn by increasing  
300 brain mass. Thus, a large brain is favored to energetically support skill growth in a challenging en-  
301 vironment. However, with exceedingly challenging environments, the individual is favored to repro-  
302 duce early without substantial body or brain growth because it fails to gain enough skills to maintain  
303 its body mass as (allo)parental care decreases with age (Fig. S12).

304 A larger adult brain is favored by moderately effective skills. When skills are ineffective at energy  
305 extraction [ $\gamma \rightarrow 0$ ; equation (5)], the brain entails little fitness benefit and fails to grow in which case  
306 the individual also reproduces without substantially growing (Fig. 3b). When skill effectiveness ( $\gamma$ )  
307 crosses a threshold value, the fitness effect of brain becomes large enough that the brain becomes  
308 favored to grow. Yet, as skill effectiveness increases further and thus fewer skills are needed for energy  
309 extraction, a smaller brain supports enough skill growth, so the optimal adult brain mass *decreases*  
310 with skill effectiveness (Fig. 3b). Hence, adult brain mass is largest with moderately effective skills.

311 A larger brain is also favored by skills that are increasingly expensive for the brain to maintain  
312 (costly memory, increasing  $B_k$ ), but exceedingly costly memory prevents body and brain growth (Fig.  
313 3c). Costly memory favors a large brain because then a larger brain mass is required to energetically  
314 support skill growth [equation (2)]. If memory is exceedingly costly, skills fail to grow and energy  
315 extraction is unsuccessful, causing the individual to reproduce without substantial growth (Fig. 3c).

### 316 **Factors favoring a large EQ and high skill**

317 A large EQ and high adult skill number are generally favored by the same factors that favor a large  
318 adult brain. However, the memory cost has a particularly strong effect favoring a large EQ because it  
319 simultaneously favors increased brain and reduced body mass (Fig. 3c,f). In contrast to its effect on  
320 EQ, increasing memory cost *disfavors* a high adult skill number (Fig. 3f). That is, a higher EQ attained  
321 by increasing memory costs is accompanied by a *decrease* in skill number (Fig. 3c,f). The factors that  
322 favor a large brain, large EQ, and high skill are similar with either power or exponential competence  
323 (Fig. 3 and Figs. S15,S16). Importantly, although with the estimated parameter values the model  
324 can recover modern human growth patterns yielding adult body and brain mass of ancient humans,  
325 our exploration of the parameters that were not estimated from data suggests that the model cannot  
326 recover modern human growth patterns yielding adult body and brain mass of *modern* humans.

## 327 **Discussion**

328 Our model shows that ecological challenges alone can be sufficient, and that evolutionary arms races  
329 in cognition are not necessary, to generate major human life history stages as well as adult brain  
330 and body mass of ancient human scale. We find that the brain is favored to grow to energetically  
331 support skill growth, and thus a large brain is favored when simultaneously (1) competence at energy  
332 extraction has a steep dependence on skill number, (2) many skills are needed for energy extraction  
333 due to environmental difficulty and moderate skill effectiveness, and (3) skills are expensive for the  
334 brain to maintain but are still necessary for energy extraction.

335 While the model considers ecological challenges alone and so evolutionary arms races in cogni-  
336 tion do not take place, the model can recover body and brain mass of ancient human scale. Predicted  
337 encephalization can match that of late *H. erectus* with competence being a power function of skills,  
338 and that of Neanderthals with competence as an exponential function. These results call for em-  
339 pirical assessment of the probability of energy extraction versus skill number (or cognitive ability,  
340 knowledge, etc.) to allow for increasingly accurate predictions (Jia *et al.*, 2013). Similarly, use of pa-  
341 rameter values for non-human taxa would allow to determine the model's ability to predict diverse

342 life histories and brain growth patterns (Moses *et al.*, 2008), offering a means to assess the explana-  
343 tory potential of ecological challenges for large-brain evolution across taxa.

344 The model also provides an explanation for observed inter- and intraspecific correlations be-  
345 tween adult cognitive ability and brain mass across taxa including humans (Andreasen *et al.*, 1993,  
346 Deaner *et al.*, 2007, MacLean *et al.*, 2014, Pietschniga *et al.*, 2015, Benson-Amram *et al.*, 2016). The  
347 explanation is the saturation with skill maintenance of the brain metabolic rate allocated to skills  
348 during the individual's lifespan [equation (6)]. The proportionality arises because the adult brain  
349 metabolic rate is found to be proportional to brain mass. This explanation follows from a general  
350 equation for the learning rate of skills [equation (2)] that is based on metabolic considerations (West  
351 *et al.*, 2001) without making assumptions about skill function; yet, this equation assumes that the  
352 fraction of brain metabolic rate allocated to the skills of interest ( $v_k$ ) is independent of brain mass  
353 (and similarly for  $B_b$  and  $B_k$ ). The model further predicts that additional variation in correlations be-  
354 tween cognitive ability and brain mass can be explained by variation in maintenance costs of brain  
355 and skill, and by variation in brain metabolic rate allocation to skill [equation (6)]. However, the  
356 model indicates that adult skill number and brain mass need not be correlated since saturation with  
357 skill maintenance of the brain metabolic rate allocated to skills may not occur during the individual's  
358 lifespan, for example if memory is inexpensive, so skill number increases throughout life (Fig. S8e).

359 Predicted adult brain mass and skill have non-monotonic relationships with their predictor vari-  
360 ables (Fig. 3 and Figs. S15,S16). Consequently, conflicting inferences can be drawn if predictor vari-  
361 ables are evaluated only on their low or high ends. For instance, increasingly challenging environ-  
362 ments favor large brains up to a point, so that exceedingly challenging environments disfavor large  
363 brains. Thus, on the low end of environmental difficulty, the prediction that increasingly challeng-  
364 ing environments favor large brains is consistent with ecological challenge hypotheses (Kaplan and  
365 Robson, 2002, Kaplan *et al.*, 2000); yet, on the high end of environmental difficulty, the prediction  
366 that increasingly challenging environments disfavor large brains is consistent with constraint hy-  
367 potheses according to which facilitation of environmental challenge favors larger brains (Austad and  
368 Fischer, 1994, Kaplan and Robson, 2002, Hintze *et al.*, 2015). Counter-intuitively on first encounter,  
369 the finding that moderately effective skills are most conducive to a large brain and high skill is sim-  
370 ply a consequence of the need of more skills when their effectiveness decreases (Fig. 3b). Regarding  
371 memory cost, the strong effect of memory cost on favoring a high EQ at first glance suggests that a  
372 larger EQ than the observed in modern humans is possible if memory were costlier (see dashed lines  
373 in Fig. 3e). However, such larger memory costs cause a substantial delay in body and brain growth,  
374 and the resulting growth patterns are inconsistent with those of modern humans (Figs. S9–S11).

375 Although our model does not include numerous details relevant to humans including social chal-

376 lenges and social learning, our results are relevant for a set of hypotheses for human-brain evolution.  
377 In particular, food processing (e.g., mechanically with stone tools or by cooking) has previously been  
378 advanced as a determinant factor in human-brain evolution as it increases energy and nutrient avail-  
379 ability from otherwise relatively inaccessible sources (Wrangham, 2009, Zink and Lieberman, 2016).  
380 Evidence of human fire control has been inconclusive for early dates (1.5 mya, associated with early  
381 *H. erectus* in South Africa), while being more secure for more recent dates (800 kya, associated with  
382 *H. erectus* in Israel) and abundant for yet more recent times (130 kya, associated with Neanderthals  
383 and *H. sapiens* throughout the Old World) (Klein, 2009). Unambiguous evidence of fire deep inside a  
384 South African cave associated to *H. erectus* has been identified for sediments dated to 1 mya (Berna  
385 *et al.*, 2012). Regarding mechanical processing, “many of the oldest stone tools bear traces of being  
386 used to slice meat” (1.5 mya in Kenya; Zink and Lieberman, 2016, Keeley and Toth, 1981) and ex-  
387 perimental evidence shows that meat slicing and vegetable pounding substantially reduce chewing  
388 effort (Zink and Lieberman, 2016). Food processing relates to our results not only in that it consti-  
389 tutes an ecological rather than a social challenge, but also in that it may help satisfy at least two of  
390 the three key conditions identified for large-brain evolution listed in the first paragraph of the Dis-  
391 cussion. First, a shift in food-processing technology (e.g., from primarily mechanical to cooking)  
392 may create a steeper relationship between energy-extraction skills and competence by substantially  
393 facilitating energy extraction (relating to condition 1). Second, food processing (e.g., by building the  
394 required tools or lighting a fire) is a challenging feat to learn and may often fail (relating to condi-  
395 tion 2). Yet, there are scant data allowing to judge the metabolic expense for the brain to maintain  
396 tool-making or fire-control skills (condition 3). Our results thus indicate that food processing may  
397 well have been a key causal factor in human brain expansion. Also, although we did not consider so-  
398 cial aspects in our model, the steepness of competence with respect to skill may increase with social  
399 learning as well. Social learning can facilitate the acquisition of adaptive skills (Boyd and Richerson,  
400 1985, van Schaik and Burkart, 2011), and skills increasing the steepness of competence with respect  
401 to skill could be particularly adaptive. In this case, sociality could favor high encephalization in the  
402 absence of cognitive arms races (van Schaik and Burkart, 2011).

403 Despite considering ecological challenges alone and additional simplifying assumptions, our  
404 model accurately predicts major stages of human life history while simultaneously recovering adult  
405 brain and body mass of ancient human scale. The model identifies various ecological drivers of large-  
406 brain evolution, in particular steep competence with respect to skill, intermediate environmental  
407 difficulty, moderate skill effectiveness, and costly memory. As we did not consider social challenges,  
408 our model cannot refute or support social challenge hypotheses. However, our results show that  
409 when the various factors favoring large brains co-occur, ecological challenges alone can be sufficient

410 to explain major aspects of human life history and large-brain evolution.

## 411 **Acknowledgments**

412 We thank Tadeusz J. Kawecki for helpful discussion. This work was funded by Swiss NSF grant PP00P3-  
413 146340 to LL.

## 414 **References**

- 415 Aiello, L.C. and Wheeler, P. (1995). The expensive-tissue hypothesis: the brain and the digestive sys-  
416 tem in human and primate evolution. *Curr. Anthropol.*, **36**, 199–221.
- 417 Allen, K.L. and Kay, R.F. (2012). Dietary quality and encephalization in platyrrhine primates. *Proc. R.*  
418 *Soc. B*, **279**, 715–721.
- 419 Amodio, D.M. and Frith, C.D. (2006). Meeting of minds: the medial frontal cortex and social cogni-  
420 tion. *Nat. Rev. Neurosci.*, **7**, 268–277.
- 421 Andreasen, N.C., Flaum, M., Swayze II, V., O’Leary, D.S., Alliger, R., Cohen, G. et al (1993). Intelligence  
422 and brain structure in normal individuals. *Am. J. Psychiatry*, **150**, 130–134.
- 423 Arbilly, M., Weissman, D.B., Feldman, M.W. and Grodzinski, U. (2014). An arms race between pro-  
424 ducers and scroungers can drive the evolution of social cognition. *Behav. Ecol.*, **25**, 487–495.
- 425 Austad, S.N. and Fischer, K.E. (1994). Primate longevity: Its place in the mammalian scheme. *Am. J.*  
426 *Primatol.*, **28**, 251–261.
- 427 Babbitt, C.C., Warner, L.R., Fedrigo, O., Wall, C.E. and Wray, G.A. (2010). Genomic signatures of diet-  
428 related shifts during human origins. *Proc. R. Soc. B*, **278**, 961–969.
- 429 Barton, R.A. (1999). The evolutionary ecology of the primate brain. In P. C. Lee, editor, *Comparative*  
430 *Primate Socioecology*, pages 167–203. Cambridge Univ. Press.
- 431 Benson-Amram, S., Dantzer, B., Stricker, G., Swanson, E.M. and Holekamp, K.E. (2016). Brain  
432 size predicts problem-solving ability in mammalian carnivores. *Proc. Natl. Acad. Sci. USA*,  
433 **doi:10.1073/pnas.1505913113**.
- 434 Berna, F., Goldberg, P., Horwitz, L.K., Brink, J., Holt, S., Bamford, M. et al (2012). Microstratigraphic  
435 evidence of in situ fire in the Acheulean strata of Wonderwerk Cave, Northern Cape province, South  
436 Africa. *Proc. Natl. Acad. Sci. USA*, **109**, E1215–E1220.



- 437 Boyd, R. and Richerson, P.J. (1985). *Culture and the Evolutionary Process*. Univ. Chicago Press.
- 438 Byrne, R. and Whiten, A., editors (1988). *Machiavellian Intelligence*. Oxford Univ. Press.
- 439 Chang, M.Y., Chiang, C.H., Hsieh, T.T., Soong, Y.K. and Hsu, K.H. (1998). Use of the antral follicle  
440 count to predict the outcome of assisted reproductive technologies. *Fertil. Steril.*, **69**, 505–510.
- 441 Charlesworth, B. (1980). *Evolution in age-structured populations*. Cambridge Univ. Press.
- 442 Clutton-Brock, T.H. and Harvey, P.H. (1980). Primates, brains and ecology. *J. Zool.*, **190**, 309–323.
- 443 Cosmides, L., Barrett, C. and Tooby, J. (2010). Adaptive specializations, social exchange, and the  
444 evolution of human intelligence. *Proc. Natl. Acad. Sci. USA*, **107**, 9007–9014. Supplement 2.
- 445 de Waal, F. (1998). *Chimpanzee Politics*. Johns Hopkins Univ. Press, 2nd edition.
- 446 Deaner, R.O., Isler, K., Burkart, J. and van Schaik, C. (2007). Overall brain size, and not encephaliza-  
447 tion quotient, best predicts cognitive ability across non-human primates. *Brain Behav. Evol.*, **70**,  
448 115–124.
- 449 Dieckmann, U., Heino, M. and Parvinen, K. (2006). The adaptive dynamics of function-valued traits.  
450 *J. Theor. Biol.*, **241**, 370–389.
- 451 Dunbar, R.I.M. (1998). The social brain hypothesis. *Evol. Anthropol.*, **6**, 178–190.
- 452 Dunbar, R.I.M. and Shultz, S. (2007). Evolution in the social brain. *Science*, **317**, 1344–1347.
- 453 Finarelli, J.A. and Flynn, J.J. (2009). Brain-size evolution and sociality in Carnivora. *Proc. Natl. Acad.*  
454 *Sci. USA*, **106**, 9345–9349.
- 455 Fish, J.L. and Lockwood, C.A. (2003). Dietary constraints on encephalization in primates. *Am. J. Phys.*  
456 *Anthropol.*, **120**, 171–181.
- 457 Frith, C.D. (2007). The social brain? *Phil. Trans. R. Soc. B*, **362**, 671–678.
- 458 Froehle, A.W. and Churchill, S.E. (2009). Energetic competition between Neandertals and anatomi-  
459 cally modern humans. *PaleoAnthropology*, pages 96–116.
- 460 Gluckman, P.D. and Hanson, M.A. (2006). Evolution, development and timing of puberty. *Trends*  
461 *Endocrinol. Metab.*, **17**, 7–12.
- 462 Healy, S.D. and Rowe, C. (2007). A critique of comparative studies of brain size. *Proc. R. Soc. B*, **274**,  
463 453–464.



- 464 Henry, P.I., Morelli, G.A. and Tronick, E.Z. (2005). Child caretakers of among the Efé foragers in the  
465 Ituri forest. In B. S. Hewlett and M. E. Lamb, editors, *Hunter-Gatherer Childhoods*, pages 191–213.  
466 Transaction.
- 467 Herrmann, E., Call, J., Hernández-Lloreda, M.V., Hare, B. and Tomasello, M. (2007). Humans have  
468 evolved specialized skills of social cognition: the cultural intelligence hypothesis. *Science*, **317**,  
469 1360–1366.
- 470 Heyes, C.M. and Frith, C.D. (2014). The cultural evolution of mind reading. *Science*, **344**, 1243091.
- 471 Hintze, A., Phillips, N. and Hertwig, R. (2015). The Janus face of Darwinian competition. *Sci. Rep.*, **5**,  
472 13662.
- 473 Hirshleifer, J. (1995). Theorizing about conflict. In K. Hartley and T. Sandler, editors, *Handbook of*  
474 *Defense and Economics*, volume 1, chapter 7, pages 165–189. Elsevier.
- 475 Humphrey, N.K. (1976). The social function of the intellect. In P. P. G. Bateson and R. A. Hinde, editors,  
476 *Growing Points in Ethology*, pages 303–317. Cambridge Univ. Press.
- 477 Isler, K. and van Schaik, C.P. (2006). Metabolic costs of brain size evolution. *Biol. Lett.*, **2**, 557–560.
- 478 Jia, H., Skaperdas, S. and Vaidya, S. (2013). Contest functions: theoretical foundations and issues in  
479 estimation. *Int. J. Ind. Organ.*, **31**, 211–222.
- 480 Jones, J.H. (2015). Resource transfers and human life-history evolution. *Annu. Rev. Anthropol.*, **44**,  
481 513–531.
- 482 Kaplan, H. and Robson, A.J. (2002). The emergence of humans: the coevolution of intelligence and  
483 longevity with intergenerational transfers. *Proc. Natl. Acad. Sci. USA*, **99**, 10221–10226.
- 484 Kaplan, H., Hill, K., Lancaster, J. and Hurtado, A.M. (2000). A theory of human life history evolution:  
485 diet, intelligence, and longevity. *Evol. Anthropol.*, **9**, 156–185.
- 486 Keeley, L.H. and Toth, N. (1981). Microwear polishes on early stone tools from Koobi Fora, Kenya.  
487 *Nature*, **293**, 464–465.
- 488 Kleiber, M. (1961). *The Fire of Life*. Wiley.
- 489 Klein, R.G. (2009). *The Human Career: Human Biological and Cultural Origins*. The Univ. of Chicago  
490 Press, 3rd edition.

- 491 Kotrschal, A., Rogell, B., Bundsen, A., Svensson, B., Zajitschek, S., Brännström, I. et al (2013). Artificial  
492 selection on relative brain size in the guppy reveals costs and benefits of evolving a larger brain.  
493 *Curr. Biol.*, **23**, 168–171.
- 494 Kuzawa, C.W., Chugani, H.T., Grossman, L.I., Lipovich, L., Muzik, O., Hof, P.R. et al (2014). Metabolic  
495 costs and evolutionary implications of human brain development. *Proc. Nat. Acad. Sci. USA*, **111**,  
496 13010–13015.
- 497 Lande, R. (1982). A quantitative genetic theory of life history evolution. *Ecology*, **63**, 607–615.
- 498 MacLean, E.L., Barrickman, N.L., Johnson, E.M. and Wall, C.E. (2009). Sociality, ecology, and relative  
499 brain size in lemurs. *J. Hum. Evol.*, **56**, 471–478.
- 500 MacLean, E.L., Sandel, A.A., Bray, J., Oldenkamp, R.E., Reddy, R.B. and Hare, B.A. (2013). Group size  
501 predicts social but not nonsocial cognition in lemurs. *PLOS ONE*, **8**, e66359.
- 502 MacLean, E.L., Hare, B., Nunn, C.L., Addessi, E., Amici, F., Anderson, R.C. et al (2014). The evolution  
503 of self-control. *Proc. Natl. Acad. Sci. USA*, **111**, E2140–E2148.
- 504 Martin, R.D. (1981). Relative brain size and basal metabolic rate in terrestrial vertebrates. *Nature*,  
505 **293**, 57–60.
- 506 Mathieson, I., Lazaridis, I., Rohland, N., Mallick, S., Patterson, N., Roodenberg, S.A. et al (2015).  
507 Genome-wide patterns of selection in 230 ancient Eurasians. *Nature*, **528**, 499–503.
- 508 McHenry, H.M. (1994). Tempo and mode in human evolution. *Proc. Natl. Acad. Sci. USA*, **91**, 6780–  
509 6786.
- 510 McNally, L. and Jackson, A.L. (2013). Cooperation creates selection for tactical deception. *Proc. R.*  
511 *Soc. B*, **280**, 20130699.
- 512 Milton, K. (1981). Distribution patterns of tropical plant foods as an evolutionary stimulus to primate  
513 mental development. *Am. Anthropol.*, **83**, 534–548.
- 514 Mink, J.W., Blumenschine, R.J. and Adams, D.B. (1981). Ratio of central nervous system to body  
515 metabolism in vertebrates: its constancy and functional basis. *Am. J. Physiol.*, **241**, R203–R212.
- 516 Moses, M.E., Hou, C., Woodruff, W.H., West, G.B., Nekola, J.C., Zuo, W. et al (2008). Revisiting a model  
517 of ontogenetic growth: estimating model parameters from theory and data. *Am. Nat.*, **171**, 632–  
518 645.

- 519 Mylius, S.D. and Diekmann, O. (1995). On evolutionarily stable life histories, optimization and the  
520 need to be specific about density dependence. *Oikos*, **74**, 218–224.
- 521 Patterson, M.A. and Rao, A.V. (2014). GPOPS-II: A MATLAB software for solving multiple-phase op-  
522 timal control problems using hp-adaptive gaussian quadrature collocation methods and sparse  
523 nonlinear programming. *ACM Trans. Math. Softw.*, **41**, 1–37.
- 524 Pérez-Barbería, F.J., Schultz, S. and Dunbar, R.I.M. (2007). Evidence for coevolution of sociality and  
525 relative brain size in three orders of mammals. *Evolution*, **61**, 2811–2821.
- 526 Peters, R.H. (1983). *The Ecological Implications of Body Size*. Cambridge Univ. Press, Cambridge, UK.
- 527 Pietschniga, J., Penke, L., Wicherts, J.M., Zeiler, M. and Voracek, M. (2015). Meta-analysis of associ-  
528 ations between human brain volume and intelligence differences: How strong are they and what  
529 do they mean? *Neurosci. Biobehav. Rev.*, **57**, 411–432.
- 530 Pontzer, H. (2015). Energy expenditure in humans and other primates: A new synthesis. *Annu. Rev.*  
531 *Anthropol.*, **44**, 169–187.
- 532 Ruff, C.B., Trinkaus, E. and Holliday, T.W. (1997). Body mass and encephalization in Pleistocene  
533 *Homo*. *Nature*, **387**, 173–176.
- 534 Schniter, E., Gurven, M., Kaplan, H.S., Wilcox, N.T. and Hooper, P.L. (2015). Skill ontogeny among  
535 Tsimane forager-horticulturalists. *Am. J. Phys. Anthropol.*, **158**, 3–18.
- 536 Sears, K.E., Kerkhoff, A.J., Messerman, A. and Itagaki, H. (2012). Ontogenetic scaling of metabolism,  
537 growth, and assimilation: Testing metabolic scaling theory with *Manduca sexta* larvae. *Physiol.*  
538 *Biochem. Zool.*, **85**, 159–173.
- 539 Seyfarth, R.M. and Cheney, D.L. (2002). What are big brains for? *Proc. Natl. Acad. Sci. USA*, **99**,  
540 4141–4142.
- 541 Shettleworth, S.J. (2010). *Cognition, Evolution, and Behavior*. Oxford Univ. Press, 2nd edition.
- 542 Skaperdas, S. (1996). Contest success functions. *Econ. Theory*, **7**, 283–290.
- 543 Sternberg, R.J. and Ben-Zeev, T. (2001). *Complex Cognition*. Oxford Univ. Press.
- 544 Taylor, A.B. and van Schaik, C.P. (2007). Variation in brain size and ecology in *Pongo*. *J. Hum. Evol.*,  
545 **52**, 59–71.
- 546 van Schaik, C.P. and Burkart, J.M. (2011). Social learning and evolution: the cultural intelligence  
547 hypothesis. *Phil. Trans. R. Soc. B*, **366**, 1008–1016.

548 West, G.B., Brown, J.H. and Enquist, B.J. (2001). A general model for ontogenetic growth. *Nature*, **413**,  
549 628–631.

550 Wrangham, R. (2009). *Catching Fire*. Basic Books.

551 Zink, K.D. and Lieberman, D.E. (2016). Impact of meat and Lower Palaeolithic food processing tech-  
552 niques on chewing in human. *Nature*, **531**, 500–503.

553 Table 1: Life history predictions. Predicted values use competence as a power or exponential func-  
554 tion (PC and EC) with their respective benchmark parameter values. Observed values are those  
555 in three *Homo* species. Predictions and observations with the same color (blue or red) agree.  
556 \*Observed adult body mass in females and adult brain mass averaged across sexes for both late  
557 *H. erectus* (McHenry, 1994) and Neanderthals (Froehle and Churchill, 2009, Ruff *et al.*, 1997). For  
558 *H. sapiens* all values are for females: age at menarche (Gluckman and Hanson, 2006), adulthood  
559 (Henry *et al.*, 2005), brain growth onset and arrest (Kuzawa *et al.*, 2014), adult body mass (Kuzawa  
560 *et al.*, 2014), and adult brain mass (Kuzawa *et al.*, 2014). †Encephalization quotient, calculated as  
561  $EQ = x_b(a_a) / [11.22 \times 10^{-3} x_T(a_a)^{0.76}]$  (mass in kg) (Martin, 1981).

|     |                                  | Predicted with |       | Observed in*           |              |                   |
|-----|----------------------------------|----------------|-------|------------------------|--------------|-------------------|
|     |                                  | PC             | EC    | late <i>H. erectus</i> | Neanderthals | <i>H. sapiens</i> |
| 562 | Menarche, $a_m$ [y]              | 9.94           | 9.70  |                        |              | 7–13              |
|     | Age at:                          |                |       |                        |              |                   |
|     | Adulthood, $a_a$ [y]             | 23.37          | 17.33 |                        |              | ≈17               |
| 563 | Brain growth onset, $a_{b0}$ [y] | 2.36           | 1.81  |                        |              | 0                 |
|     | Brain growth arrest, $a_b$ [y]   | 7.19           | 7.34  |                        |              | ≈17               |
|     | Adult body mass, [kg]            | 53.19          | 67.79 | 55                     | 66.4         | 51.1              |
|     | Adult brain mass, [kg]           | 1.02           | 1.53  | 0.98                   | 1.44         | 1.31              |
|     | EQ <sup>†</sup> , [ ]            | 4.43           | 5.52  | 4.15                   | 5.30         | 5.87              |

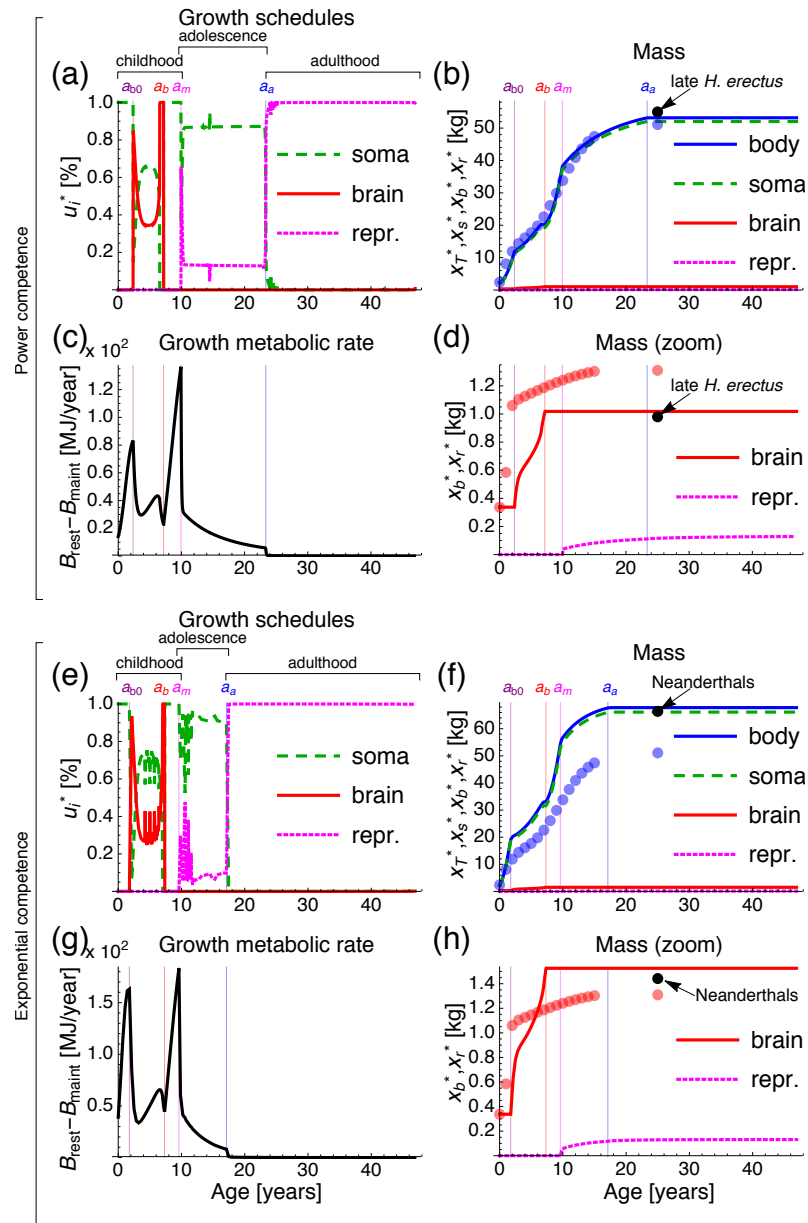

564 Figure 1: Ecological challenges alone can generate modern human life history stages and ancient  
 565 human body and brain sizes. Lines are model's predictions and large dots are observations. Results  
 566 with (a-d) power and (e-h) exponential competence. (a,e) Predicted growth schedules vs. age. (c,g)  
 567 Growth metabolic rate vs. age. (b,f) Predicted body and tissue mass vs. age. (d,h) Predicted brain  
 568 and reproductive mass vs. age. Dots and lines with the same color are respectively the observed  
 569 and predicted values in modern human females (Kuzawa *et al.*, 2014). Black dots are the observed  
 570 (b,f) adult female body mass and (d,h) adult sex-averaged brain mass, either for late *H. erectus* or  
 571 Neanderthals (Table 1). Jitter in growth schedules (a,e) is due to negligible numerical error (Fig. S3).

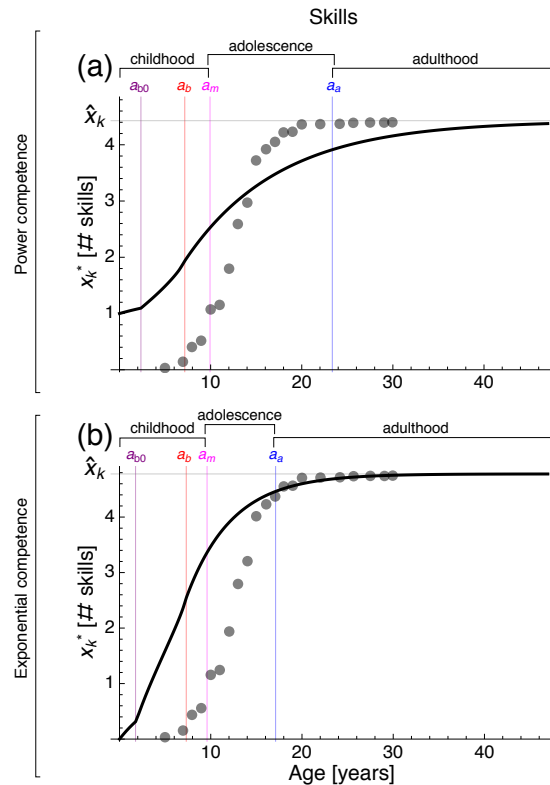

572 Figure 2: Predicted skill ontogeny plateaus before the end of the individual's reproductive career.  
573 Lines are the predicted number of skills vs. age with power (a) and exponential (b) competence for  
574 the results in Fig 1. Dots are the observed cumulative distribution of self-reported acquisition ages  
575 of food production skills in female Tsimane horticulturalists (Schniter *et al.*, 2015) multiplied by our  
576  $\hat{x}_k$ . However, note that the observed skills in Tsimane include socially learned skills which we do not  
577 consider explicitly in the model.

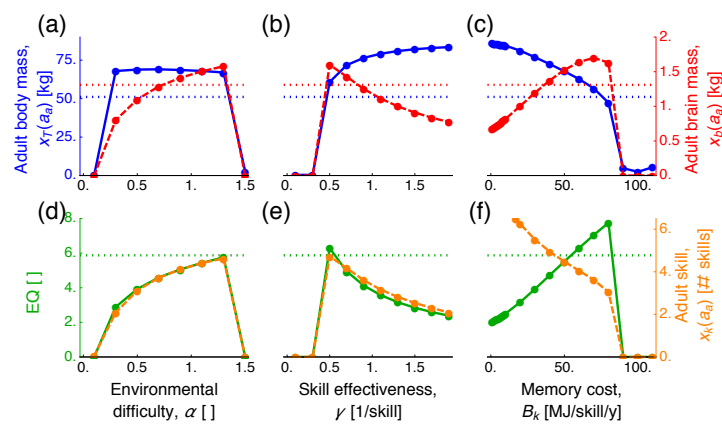

578 Figure 3: Large adult brain mass and EQ are favored by environmental difficulty, moderate skill ef-  
 579 fectiveness, and costly memory. Plots are the predicted adult body and brain mass, EQ, and skill vs.  
 580 parameter values with exponential competence. a-c show adult body mass (blue) and adult brain  
 581 mass (red). d-f show adult EQ (green) and skill (orange). Vertical axes are in different scales. Dashed  
 582 horizontal lines are the observed values in modern human females (Kuzawa *et al.*, 2014).

583



1  
2  
3  
4  
5  
6  
7  
8  
9  
10  
11  
12  
13  
14  
15  
16  
17  
18  
19  
20  
21  
22  
23  
24  
25  
26  
27  
28

# Supporting Information for: Evolution of brain ontogenetic growth under ecological challenges

Mauricio González-Forero, Timm Faulwasser, and Laurent Lehmann

## Contents

|          |                                                                                                        |           |
|----------|--------------------------------------------------------------------------------------------------------|-----------|
| <b>1</b> | <b>Model</b>                                                                                           | <b>3</b>  |
| 1.1      | Tracking resting metabolic rate . . . . .                                                              | 3         |
| 1.2      | Energy use . . . . .                                                                                   | 3         |
| 1.3      | Tissue mass . . . . .                                                                                  | 4         |
| 1.4      | Skills . . . . .                                                                                       | 5         |
| 1.5      | Energy acquisition . . . . .                                                                           | 5         |
| 1.6      | Fitness and evolving traits . . . . .                                                                  | 6         |
| 1.7      | Model summary . . . . .                                                                                | 6         |
| <b>2</b> | <b>Optimal control problem</b>                                                                         | <b>8</b>  |
| 2.1      | Problem statement . . . . .                                                                            | 8         |
| 2.2      | The Pontryagin Maximum Principle . . . . .                                                             | 9         |
| <b>3</b> | <b>Analytical results</b>                                                                              | <b>11</b> |
| <b>4</b> | <b>Derivation of analytical results</b>                                                                | <b>15</b> |
| 4.1      | Singular controls for regime BS: $\sigma_s > 0$ , $\sigma_b > 0$ , and $\sigma_s = \sigma_b$ . . . . . | 15        |
| 4.2      | Singular controls for regime BR: $\sigma_s < 0$ and $\sigma_b = 0$ . . . . .                           | 16        |
| 4.3      | Singular controls for regime RS: $\sigma_s = 0$ and $\sigma_b < 0$ . . . . .                           | 17        |
| 4.4      | Singular controls for regime BRS: $\sigma_s = \sigma_b = 0$ . . . . .                                  | 18        |
| <b>5</b> | <b>Parameter values</b>                                                                                | <b>21</b> |
| <b>6</b> | <b>Estimation of parameter values</b>                                                                  | <b>22</b> |
| 6.1      | Values for $B_i$ for $i \in \{b, r, s\}$ . . . . .                                                     | 22        |
| 6.2      | Values for $E_i$ for $i \in \{b, r, s\}$ . . . . .                                                     | 22        |
| 6.3      | Values for $K$ and $\beta$ . . . . .                                                                   | 23        |
| 6.4      | Values for $f_0$ , $\mu$ , and $\tau$ . . . . .                                                        | 24        |

|    |                                                                                                         |           |
|----|---------------------------------------------------------------------------------------------------------|-----------|
| 29 | <b>7 Supplementary results</b>                                                                          | <b>25</b> |
| 30 | 7.1 Brain metabolic rate through ontogeny . . . . .                                                     | 25        |
| 31 | 7.2 Mass of reproductive tissue . . . . .                                                               | 26        |
| 32 | 7.3 Effect of the absence of (allo)parental care . . . . .                                              | 26        |
| 33 | 7.4 Indeterminate skill growth with inexpensive memory . . . . .                                        | 27        |
| 34 | 7.5 Large, yet inconsistent-with-data encephalization with exceedingly expensive memory . . . . .       | 28        |
| 35 | 7.6 Reproduction without growth and body collapse for certain parameter values . . . . .                | 30        |
| 36 | 7.7 A large brain is also favored by small metabolic costs of learning, few innate skills, and interme- |           |
| 37 | diate allocation of brain metabolic rate to skills . . . . .                                            | 32        |
| 38 | <b>References</b>                                                                                       | <b>33</b> |

## 39 1 Model

40 In this section we derive the equations of the model presented in the main text [equations (1–4)] and formulate  
41 the evolutionary question. This question gives rise to an optimal control problem that we describe in section  
42 2.1.

### 43 1.1 Tracking resting metabolic rate

44 Life history models generally study the allocation of an individual's energy budget to different functions  
45 (Kozłowski, 1992). Consequently, parameters in life history models refer to complete components of the en-  
46 ergy budget (e.g., assimilated energy (Ziółko and Kozłowski, 1983)). In practice, it is easier to measure heat  
47 release (metabolic rates) (Blaxter, 1989). Hence, in order to facilitate parameter measurement, we follow the  
48 approach of West *et al.* (2001) to formulate our life history model in terms of resting metabolic rate allocation  
49 rather than energy budget allocation. Thus, in the model, we track how resting metabolic rate is due to growth  
50 and maintenance of different tissues, in particular the brain.

51 We start from the partition of the individual's energy budget used by Hou *et al.* (2008) which divides the  
52 energy budget (assimilation rate) into heat released at rest (resting metabolic rate) and the remainder (see  
53 Blaxter (1989) for details into why this partition is correct). The amount of energy used per unit time by an  
54 individual is its assimilation rate. Part of this energy per unit time is stored in the body ( $S$ ) and the rest is the  
55 total metabolic rate which is the energy released as heat per unit time after use. Part of the total metabolic rate  
56 is the resting metabolic rate  $B_{\text{rest}}$  and the rest is the energy released as heat per unit time due to activity  $B_{\text{act}}$ . In  
57 turn, part of the resting metabolic rate is due to maintenance of existing biomass  $B_{\text{maint}}$ , and the rest is due to  
58 production of new biomass  $B_{\text{syn}}$ . We refer to  $B_{\text{syn}}$  as the growth metabolic rate. This partitioning is illustrated  
59 in Fig. S1. We formulate our model in terms of allocation of resting metabolic rate  $B_{\text{rest}}$  to maintenance and  
60 growth of the different tissues.

### 62 1.2 Energy use

63 Suppose that an individual of age  $a$  has a number  $N_i(a)$  of cells of type  $i$ , for  $i \in \{b, r, s\}$  corresponding to  
64 brain, reproductive, and (the remainder) somatic cells, respectively. Assume that an average cell of type  $i$  in  
65 the resting body releases as heat an amount of energy  $B_{ci}$  per unit time. Hence, the total amount of energy  
66 released as heat per unit time by existing cells in the resting individual is

$$B_{\text{maint}}(a) = N_b(a)B_{cb} + N_r(a)B_{cr} + N_s(a)B_{cs}, \quad (\text{S1})$$

67 which gives the part of resting metabolic rate due to body mass maintenance (Hou *et al.*, 2008).

68 Assume that producing a new average cell of type  $i$  releases as heat an amount of energy  $E_{ci}$ . Hence, the  
69 total amount of energy released as heat per unit time by the resting individual due to production of new cells  
70 is

$$B_{\text{syn}}(a) = \dot{N}_b(a)E_{cb} + \dot{N}_r(a)E_{cr} + \dot{N}_s(a)E_{cs}, \quad (\text{S2})$$

71 which gives the rate of heat release in biosynthesis (Hou *et al.*, 2008), and we call it the growth metabolic rate.

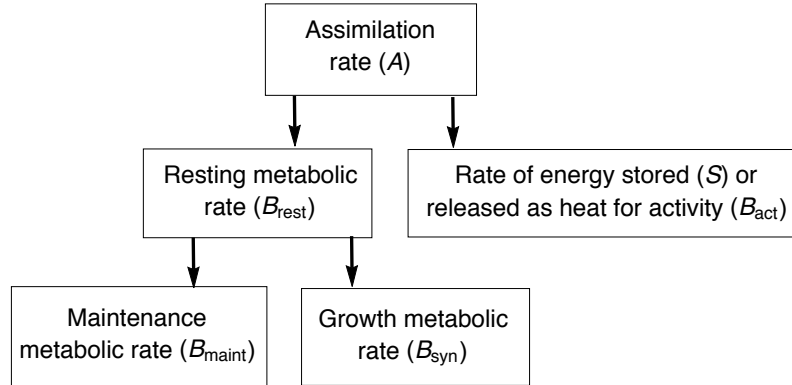

61

Figure S1: Relation of resting metabolic rate to assimilation rate. Modified from Hou *et al.* (2008).

72 From (S2), we have that

$$\dot{N}_i(a)E_{ci} = u_i(a)B_{\text{syn}}(a), \quad (\text{S3})$$

73 for  $i \in \{b, r, s\}$ , where  $u_i(a)$  is the fraction of growth metabolic rate due to production of new type- $i$  cells [sum-  
74 ming over all cell types returns (S2)].

75 Adding the expressions above, the total amount of energy released as heat by the resting individual per unit  
76 time is

$$B_{\text{rest}}(a) = B_{\text{maint}}(a) + B_{\text{syn}}(a). \quad (\text{S4})$$

### 77 1.3 Tissue mass

78 Let the mass of an average cell of type  $i$  be  $x_{ci}$  for  $i \in \{b, r, s\}$ . Then, the mass of tissue  $i$  at age  $a$  is

$$x_i(a) = x_{ci}N_i(a), \quad (\text{S5})$$

79 and hence, using (S3), we have that

$$\begin{aligned} \dot{x}_i(a) &= x_{ci}\dot{N}_i(a) \\ &= \frac{x_{ci}}{E_{ci}}u_i(a)B_{\text{syn}}(a). \end{aligned} \quad (\text{S6})$$

80 Defining  $E_i = E_{ci}/x_{ci}$ , this gives

$$\dot{x}_i(a) = u_i(a)\frac{B_{\text{syn}}(a)}{E_i} \quad (\text{S7})$$

81 for  $i \in \{b, r, s\}$ . From (S4), we then have equation (1) of the main text where from (S1)

$$B_{\text{maint}}(a) = x_b(a)B_b + x_r(a)B_r + x_s(a)B_s \quad (\text{S8})$$

82 and  $B_i = B_{Ci} / x_{Ci}$ . We will denote body mass at age  $a$  as  $x_T(a) = x_b(a) + x_r(a) + x_s(a)$ .

### 83 1.4 Skills

84 We consider that some of the brain metabolic rate is to acquiring and maintaining energy-extraction skills. We  
 85 assume that the individual at age  $a$  has a number  $x_k(a)$  of energy-extraction skills. From energy conservation  
 86 and (S1) and (S2), the brain metabolic rate must equal  $M_{\text{brain}}(a) = x_b(a)B_b + \dot{x}_b(a)E_b$ . We thus let  $v_k$  be the  
 87 fraction of brain metabolic rate that is due to acquiring and maintaining energy-extraction skills (or brain's  
 88 allocation to energy-extraction skills). Suppose that the brain releases as heat an amount of energy  $E_k$  for  
 89 acquiring an average energy-extraction skill (learning cost). Similarly, assume that the brain releases as heat  
 90 an amount of energy  $B_k$  per unit time for maintaining an average energy-extraction skill (memory cost). Hence,  
 91 from energy conservation,

$$x_k(a)B_k + \dot{x}_k(a)E_k = v_k [x_b(a)B_b + \dot{x}_b(a)E_b]. \quad (\text{S9})$$

92 Rearranging, we have

$$\dot{x}_k(a) = \frac{v_k [x_b(a)B_b + \dot{x}_b(a)E_b] - x_k(a)B_k}{E_k}, \quad (\text{S10})$$

93 which is equation (2) in the main text. [A similar reasoning can be used to derive (S7), not in terms of allocation  
 94 to tissue growth  $u_i(a)$ , but in terms of allocation to tissue growth *and* maintenance  $v_i(a)$ .]

### 95 1.5 Energy acquisition

96 We now derive an expression that specifies how energy extraction affects fitness in the model. To that end, we  
 97 assume that at age  $a$  the individual obtains an amount of energy  $E(x_k(a))$  per unit time from the environment,  
 98 which we assume depends on skill  $x_k(a)$  (and possibly body mass). The quantity  $E(x_k(a))$  is thus the indi-  
 99 vidual's energetic production per unit time at age  $a$ . Let  $E_{\text{max}}(a)$  be the amount of energy that the individual  
 100 obtains from the environment per unit time at age  $a$  if it is maximally successful at energy extraction (which  
 101 also possibly depends on body mass). Let us use  $x \equiv y$  to denote that  $x$  is defined as  $y$ . Then, we define the  
 102 probability of energy extraction at age  $t$  as the normalized production per unit time at age  $a$ :

$$p(x_k(a)) \equiv \frac{E(x_k(a))}{E_{\text{max}}(a)}. \quad (\text{S11})$$

103 We also define the ratio of resting metabolic rate and energy obtained per unit time as

$$q(x_k(a)) \equiv \frac{B_{\text{rest}}(a)}{E(x_k(a))} \quad (\text{S12})$$

104 and, motivated by (S12), the quantity

$$B_{\text{rest,max}}(a) \equiv q(x_k(a)) E_{\text{max}}(a) \quad (\text{S13a})$$

$$= \frac{B_{\text{rest}}(a)}{p(x_k(a))}. \quad (\text{S13b})$$

105 From (S13b), we have that

$$B_{\text{rest}}(a) = p(x_k(a)) B_{\text{rest,max}}(a). \quad (\text{S14})$$

106 Consequently,  $B_{\text{rest,max}}(a)$  gives the resting metabolic rate when the individual is maximally successful at en-  
 107 ergy extraction. Adult resting metabolic rate typically scales with adult body mass as a power law across all

108 living systems (Kleiber, 1932, 1961; Peters, 1983; Schmidt-Nielsen, 1984), and also ontogenetically in humans  
109 to a good approximation (Fig. S4; see also Sears *et al.* (2012)). Hence, assuming that  $p(x_k(a))$  is independent  
110 of body mass, we assume that

$$B_{\text{rest,max}}(a) = Kx_T(a)^\beta, \quad (\text{S15})$$

111 where  $K$  is a constant independent of body mass. Equation (S14) then becomes equation (4) in the main text.

## 112 1.6 Fitness and evolving traits

113 We consider the growth schedules  $u_i(a)$  for  $i \in \{b, r, s\}$  as evolving traits, and we make assumptions (see below)  
114 that imply that these schedules attain evolutionarily stable values (Lande, 1982; Mylius and Diekmann, 1995).  
115 To obtain evolutionarily stable growth schedules we need a fitness measure. To obtain this measure, we con-  
116 sider a randomly mating population of constant size, with overlapping generations, where the environment is  
117 constant, and where the age of individuals is measured in continuous time. We assume that the probability  
118  $l(a)$  that a newborn survives to age  $t$  satisfies

$$\dot{l}(a) = -\mu l(a) \quad (\text{S16})$$

119 where  $\mu$  is the mortality rate. For simplicity, we take mortality rate as constant.

120 We obtain a measure of fertility as follows. We partition the mass-specific resting metabolic rate of repro-  
121 ductive tissue  $B_r$  into a component due to maintenance of reproductive tissue itself  $B_{r_a}$  and a component due  
122 to production of offspring cells  $B_{r_o}$ . That is,  $B_r = B_{r_a} + B_{r_o}$  (note that  $B_{r_o}$  is not part of  $E_r$  because the latter refers  
123 to the production of mother's cells). Let  $\dot{N}_o(a)$  be the number of offspring cells produced by the individual per  
124 unit time at age  $t$ . Hence, the number of offspring cells produced is given by  $\dot{N}_o(a) = C_1 B_{r_a} N_r(a)$  for some  
125 constant  $C_1$ . Then, we assume that fertility, defined as the number of offspring produced per unit time at age  
126  $a$ , is

$$f(a) = C_2 \dot{N}_o(a) = C_3 N_r(a) = f_0 x_r(a), \quad (\text{S17})$$

127 where  $C_2$ ,  $C_3$ , and  $f_0$  are proportionality constants defined in the absence of density dependence competition.  
128 We also assume that costs of parental or alloparental care are included in  $f_0$ . Fertility is then proportional to  
129 the mass of reproductive tissue (King and Roughgarden, 1982).

130 From (S16)–(S17), the individual's lifetime number of offspring produced in the absence of  
131 density-dependent competition (Mylius and Diekmann, 1995) is then given by

$$R_0 = \int_0^\tau l(a) f(a) da, \quad (\text{S18})$$

132 where  $\tau$  is an age after which the individual no longer reproduces. With additional standard assumptions,  
133 evolutionarily stable growth schedules in the population of constant size regulated through fertility must max-  
134 imize  $R_0$  (Mylius and Diekmann, 1995), and so we take  $R_0$  as a fitness (objective) function that is maximized  
135 by the evolving growth schedules  $u_i(a)$  at an evolutionary equilibrium.

## 136 1.7 Model summary

137 Our model specifies the ontogenetic dynamics of the brain, reproductive, and somatic tissue mass,  $x_b$ ,  $x_r$  and  
138  $x_s$ , and of the number of energy-extraction skills  $x_k$  of the individual. The dynamics of these four state vari-

139 ables is expressed in terms of the growth schedules  $u_i(a)$  that we take as evolving traits and of 22 parameters:  
140 namely, 11 tissue- and skill-metabolism parameters ( $K$ ,  $\beta$ ,  $\nu_k$ , and  $B_i$  and  $E_i$  for  $i \in \{b, r, s, k\}$ ); 3 demographic  
141 parameters ( $f_0$ ,  $\mu$ , and  $\tau$ ); 2 contest success parameters ( $\alpha$  and  $\gamma$ ); 2 (allo)parental care parameters ( $\varphi_0$  and  $\varphi_r$ );  
142 and 4 newborn tissue mass and newborn skill parameters  $[x_i(0)$  for  $i \in \{b, r, s, k\}$ ]. Parameter  $f_0$  only displaces  
143 the objective vertically and thus has no effect on the optimal growth schedules.

144 We now formulate the optimal control problem posed by our evolutionary model and later describe how  
145 we estimated parameter values from empirical data.



## 146 2 Optimal control problem

### 147 2.1 Problem statement

148 The maximization of  $R_0$  by the growth schedules  $u_i(a)$  for all  $a \in [0, \tau]$  [or  $u(\cdot)$  for short] poses an optimal  
 149 control problem (King and Roughgarden, 1982; Iwasa and Roughgarden, 1984; Perrin, 1992; Irie and Iwasa,  
 150 2005; Sydsæter *et al.*, 2008). In the terminology of optimal control theory, we have the control variables

$$\mathbf{u}(a) = (u_b(a), u_r(a), u_s(a)) \in [0, 1] \quad \text{subject to} \quad u_b(\cdot) + u_r(\cdot) + u_s(\cdot) = 1, \quad (\text{S19a})$$

151 and the state variables

$$\mathbf{x}(a) = (x_b(a), x_r(a), x_s(a), x_k(a)) \geq 0. \quad (\text{S19b})$$

152 For readability, we will suppress the argument in  $\mathbf{u}(a)$  and  $\mathbf{x}(a)$ , and write  $\mathbf{u}$  and  $\mathbf{x}$ .

153 We then have the optimal control problem

$$\max_{\mathbf{u}(\cdot)} R_0, \quad (\text{S19c})$$

154 where from (S16)–(S18)

$$R_0 = f_0 \int_0^\tau e^{-\mu a} x_r da, \quad (\text{S19d})$$

155 subject to the dynamic constraints

$$\dot{\mathbf{x}} = \mathbf{g}(\mathbf{u}, \mathbf{x}, a), \quad (\text{S19e})$$

156 with

$$g_i(\mathbf{u}, \mathbf{x}, a) = e_i u_i B_{\text{syn}}(\mathbf{x}, a) \quad \text{for } i \in \{\text{b}, \text{r}, \text{s}\} \quad (\text{S19f})$$

$$g_k(\mathbf{u}, \mathbf{x}, a) = d_1 [x_b B_b + u_b B_{\text{syn}}(\mathbf{x}, a)] - d_2 x_k, \quad (\text{S19g})$$

157 which are obtained from (S7) and (S10), where  $e_i = 1/E_i$ ,  $d_1 = v_k/E_k$ , and  $d_2 = B_k/E_k$ . From (S4), (S8), (S14),

158 and (S15), we have that growth metabolic rate is

$$B_{\text{syn}}(\mathbf{x}, a) = K p(x_k, a) x_T^\beta - B_b x_b - B_r x_r - B_s x_s, \quad (\text{S19h})$$

159 where body mass is

$$x_T = x_b + x_r + x_s, \quad (\text{S19i})$$

160 and, from (5) in the main text, the probability of energy extraction at age  $a$  is

$$p(x_k, a) = \frac{c(x_k)}{\alpha - \varphi_0 e^{-\varphi_r a} + c(x_k)}, \quad (\text{S19j})$$

161 where competence at energy extraction is

$$c(x_k) = \begin{cases} x_k^\gamma & \text{(power competence)} \\ e^{\gamma x_k} & \text{(exponential competence)}. \end{cases} \quad (\text{S19k})$$

162 Finally, the initial conditions of (S19e) are

$$x_i(0) = x_{i0} \quad \text{for all } i \quad (\text{S19l})$$

163 and we do not consider any terminal conditions for (S19e) .

## 164 2.2 The Pontryagin Maximum Principle

165 Necessary first-order conditions for maximizing the objective  $R_0$  with respect to the controls throughout  $t$  are  
 166 given by the Pontryagin maximum principle (Bryson, Jr. and Ho, 1975; Kamien and Schwartz, 2012; Sydsæter  
 167 *et al.*, 2008). The Pontryagin maximum principle states that if  $(\mathbf{u}^*, \mathbf{x}^*)$  is a solution to the optimal control  
 168 problem (S19), then an associated function, the Hamiltonian, is maximized with respect to the controls when  
 169 evaluated at  $(\mathbf{u}^*, \mathbf{x}^*)$ . The Hamiltonian for problem (S19) is

$$H(\mathbf{u}, \mathbf{x}, \boldsymbol{\lambda}, a) = f_0 e^{-\mu a} x_r + \sum_{i \in \{b, r, s, k\}} \lambda_i g_i(\mathbf{u}, \mathbf{x}, a), \quad (\text{S20})$$

170 where  $\lambda_i$  is the costate variable associated to state variable  $i$  and  $\boldsymbol{\lambda}$  is the vector of costates. Here we also drop  
 171 the argument of  $\lambda_i(a)$  and write simply  $\lambda_i$ . A costate variable gives the marginal value of the corresponding  
 172 state variable; that is, it is the effect on the maximized objective (fitness) for a marginal change in the cor-  
 173 responding state variable (Dorfman, 1969). Thus, we now proceed to maximize the Hamiltonian to obtain  
 174 candidate optimal controls  $\mathbf{u}^*$  that satisfy these necessary conditions for optimality.

175 Due to the constraint  $u_b + u_r + u_s = 1$ , we set  $u_r = 1 - u_b - u_s$  and only two controls must be determined:  $u_b^*$   
 176 and  $u_s^*$ . Using (S19f) and (S19g), collecting for  $B_{\text{syn}}$  in (S20), and evaluating at  $\mathbf{x} = \mathbf{x}^*$  we have

$$H(\mathbf{u}, \mathbf{x}^*, \boldsymbol{\lambda}, a) = f_0 e^{-\mu a} x_r^* + B_{\text{syn}}(\mathbf{x}^*, a) \phi(\mathbf{u}, \boldsymbol{\lambda}) + \lambda_k \xi(\mathbf{x}^*), \quad (\text{S21})$$

177 where

$$\phi(\mathbf{u}, \boldsymbol{\lambda}) = u_b \sigma_b + u_s \sigma_s + e_r \lambda_r \quad (\text{S22a})$$

$$\xi(\mathbf{x}^*) = d_1 x_b^* B_b - d_2 x_k^* \quad (\text{S22b})$$

178 and

$$\sigma_b(\boldsymbol{\lambda}) = e_b \lambda_b - e_r \lambda_r + d_1 \lambda_k \quad (\text{S23a})$$

$$\sigma_s(\boldsymbol{\lambda}) = e_s \lambda_s - e_r \lambda_r. \quad (\text{S23b})$$

179 We thus seek to maximize (S21) with respect to  $\mathbf{u} = (u_b, u_s)$ .

180 The derivatives of the Hamiltonian (S21) with respect to the two controls  $(u_b, u_s)$  are [see equation (10) on  
 181 p. 126 of Kamien and Schwartz (2012)]

$$\left. \frac{\partial H(\mathbf{u}, \mathbf{x}^*, \boldsymbol{\lambda}, a)}{\partial u_i} \right|_{\mathbf{u}=\mathbf{u}^*} = B_{\text{syn}} \sigma_i \quad \text{for } i \in \{b, s\}. \quad (\text{S24})$$

182 If  $B_{\text{syn}} > 0$ , then the Hamiltonian is maximized with respect to  $u_b$  and  $u_s$  depending on the signs of the switch-  
 183 ing functions  $\sigma_i$  and, because of the constraint that  $u_b + u_s \leq 1$ , also depending on the sign of the difference

$$\sigma_s - \sigma_b = e_s \lambda_s - e_b \lambda_b - d_1 \lambda_k. \quad (\text{S25})$$

184 By definition, the costates satisfy [see equation (7) on p. 126 of Kamien and Schwartz (2012)]

$$\dot{\lambda}_i = - \left. \frac{\partial H(\mathbf{u}^*, \mathbf{x}, \boldsymbol{\lambda}, a)}{\partial x_i} \right|_{\mathbf{x}=\mathbf{x}^*} \quad \text{for } i \in \{b, r, s, k\} \quad (\text{S26a})$$

$$\lambda_i(\tau) = 0. \quad (\text{S26b})$$

185 Hence, the dynamical equations of the costates are

$$\dot{\lambda}_b = -(\phi\psi_b + \lambda_k d_1 B_b) \quad (\text{S27a})$$

$$\dot{\lambda}_r = -(\phi\psi_r + f_0 e^{-\mu a}) \quad (\text{S27b})$$

$$\dot{\lambda}_s = -\phi\psi_s \quad (\text{S27c})$$

$$\dot{\lambda}_k = -(\phi\psi_k - \lambda_k d_2), \quad (\text{S27d})$$

186 evaluated at  $(\mathbf{x}^*, \mathbf{u}^*)$ , where we define

$$\psi_i(\mathbf{x}^*, a) = \left. \frac{\partial B_{\text{syn}}}{\partial x_i} \right|_{\mathbf{x}=\mathbf{x}^*} \quad (\text{S28})$$

187 for  $i \in \{b, r, s, k\}$ . Note that the marginal returns on energy extraction from increasing skill and skill synergy are

188 respectively

$$\frac{\partial p}{\partial x_k} = p(1-p) \frac{d \ln c(x_k)}{dx_k} \quad (\text{S29a})$$

$$= p(1-p) \frac{\gamma}{\delta(x_k)} \quad (\text{S29b})$$

$$\frac{\partial^2 p}{\partial x_k^2} = p(1-p) \left[ \frac{d^2 \ln c(x_k)}{dx_k^2} + (1-2p) \left( \frac{d \ln c(x_k)}{dx_k} \right)^2 \right] \quad (\text{S29c})$$

$$= p(1-p) \frac{\gamma}{\delta(x_k)^2} [\gamma(1-2p) - \hat{\delta}], \quad (\text{S29d})$$

189 where

$$\delta(x_k^*) = \begin{cases} x_k^* & \text{for } c(x_k) = x_k^\gamma \\ 1 & \text{for } c(x_k) = e^{\gamma x_k}, \end{cases} \quad (\text{S30a})$$

$$\hat{\delta} = \begin{cases} 1 & \text{if } c(x_k) = x_k^\gamma \\ 0 & \text{if } c(x_k) = e^{\gamma x_k}. \end{cases} \quad (\text{S30b})$$

190 Hence,

$$\psi_i(\mathbf{x}^*, a) = \psi(\mathbf{x}^*, a) - B_i \quad \text{for } i \in \{b, r, s\} \quad (\text{S31a})$$

$$\psi_k(\mathbf{x}^*, a) = K \frac{\partial p}{\partial x_k} x_T(\mathbf{x}^*)^\beta \quad (\text{S31b})$$

$$= K \gamma p(x_k^*, a) [1 - p(x_k^*, a)] \frac{x_T(\mathbf{x}^*)^\beta}{\delta(x_k^*)}, \quad (\text{S31c})$$

191 whereby

$$\psi(\mathbf{x}^*, a) = K \beta p(x_k^*, a) x_T(\mathbf{x}^*)^{\beta-1}. \quad (\text{S31d})$$

### 192 3 Analytical results

193 We present the analytical results for the candidate optimal controls in this section, and their derivations in  
194 section 4. In these two sections, we assume that growth metabolic rate is positive; that is,  $B_{\text{syn}}(\mathbf{x}^*, t) > 0$ .

195 The Hamiltonian of the optimal control problem (S19) is affine (or, less rigorously, linear) in the controls  
196 [equation (S21)]. Since we assume that  $B_{\text{syn}}(\mathbf{x}^*, a) > 0$ , the sign of the derivative of the Hamiltonian with re-  
197 spect to  $u_s$  or  $u_b$  is given by the sign of the two switching functions  $\sigma_s$  and  $\sigma_b$  [equations (S23)]. If  $\sigma_i$  is negative,  
198 the Hamiltonian is maximized when  $u_i^* = 0$ . If  $\sigma_i$  is positive and the other switching function, denoted by  $\sigma_{i'}$ ,  
199 is negative, then the Hamiltonian is maximized when  $(u_i^*, u_{i'}^*) = (1, 0)$ . If both  $\sigma_i$  and  $\sigma_{i'}$  are positive, because  
200 of the constraint that  $u_s^* + u_b^* \leq 1$ , the Hamiltonian is maximized when  $(u_i^*, u_{i'}^*) = (1, 0)$  if and only if  $\sigma_i > \sigma_{i'}$ .  
201 If  $\sigma_i$  is zero and  $\sigma_{i'}$  is positive, then the Hamiltonian is maximized when  $(u_i^*, u_{i'}^*) = (0, 1)$ . If  $\sigma_i$  is zero and  $\sigma_{i'}$   
202 is negative, then the Hamiltonian is maximized when  $u_{i'}^* = 0$  but the Hamiltonian is independent of  $u_i$ . In this  
203 case, the candidate optimal control  $u_i^* = \hat{u}_i$  is called a singular arc and must be determined by another method  
204 (Bryson, Jr. and Ho, 1975). If both  $\sigma_s$  and  $\sigma_b$  are zero, the Hamiltonian is independent of both controls and the  
205 candidate optimal controls are the singular arcs  $(u_s^*, u_b^*) = (\hat{u}_s, \hat{u}_s)$ . Finally, if both  $\sigma_s$  and  $\sigma_b$  are positive and  
206 equal, then both  $u_s^*$  and  $u_b^*$  are positive and maximal given the constraint  $u_s^* + u_b^* \leq 1$ , so  $(u_s^*, u_b^*) = (1 - \hat{u}_b, \hat{u}_b)$ .

207 Together, these cases show that there are seven possible growth regimes (Table S1). Regimes B, R, and S  
208 involve pure growth of one of the three tissues, whereas regimes BS, BR, RS, and BRS are singular arcs where at  
209 least two tissues grow simultaneously. These regimes occur as indicated in Table S1 depending on the sign of  
210 both the switching functions and their difference. Numerical illustration of these regimes is given in Fig. S2.

| Regime | Tissues growing               | Candidate optimal controls   | Sign of switching functions                            |
|--------|-------------------------------|------------------------------|--------------------------------------------------------|
|        |                               | $(u_s^*, u_b^*)$             | $\text{sign}(\sigma_s, \sigma_b, \sigma_s - \sigma_b)$ |
| R      | Reproductive                  | $(0, 0)$                     | $(-, -, \cdot)$                                        |
| B      | Brain                         | $(0, 1)$                     | $(-, +, \cdot), (+, +, -), (0, +, \cdot)$              |
| S      | Soma                          | $(1, 0)$                     | $(+, -, \cdot), (+, +, +), (+, 0, \cdot)$              |
| BS     | Brain and soma                | $(1 - \hat{u}_b, \hat{u}_b)$ | $(+, +, 0)$                                            |
| BR     | Brain and reproductive        | $(0, \hat{u}_b)$             | $(-, 0, \cdot)$                                        |
| RS     | Reproductive and soma         | $(\hat{u}_s, 0)$             | $(0, -, \cdot)$                                        |
| BRS    | Brain, reproductive, and soma | $(\hat{u}_s, \hat{u}_b)$     | $(0, 0, \cdot)$                                        |

Table S1: Growth regimes. Four regimes are singular arcs. Note that  $u_r^* = 1 - u_s^* - u_b^*$ . The “ $\cdot$ ” means any sign.

216 For simplicity of presentation in the remainder of section 3 and 4, we will explicitly write the arguments of  
217 a function only when defining the function and will suppress their writing elsewhere, except in a few places  
218 where it is useful to recall them.

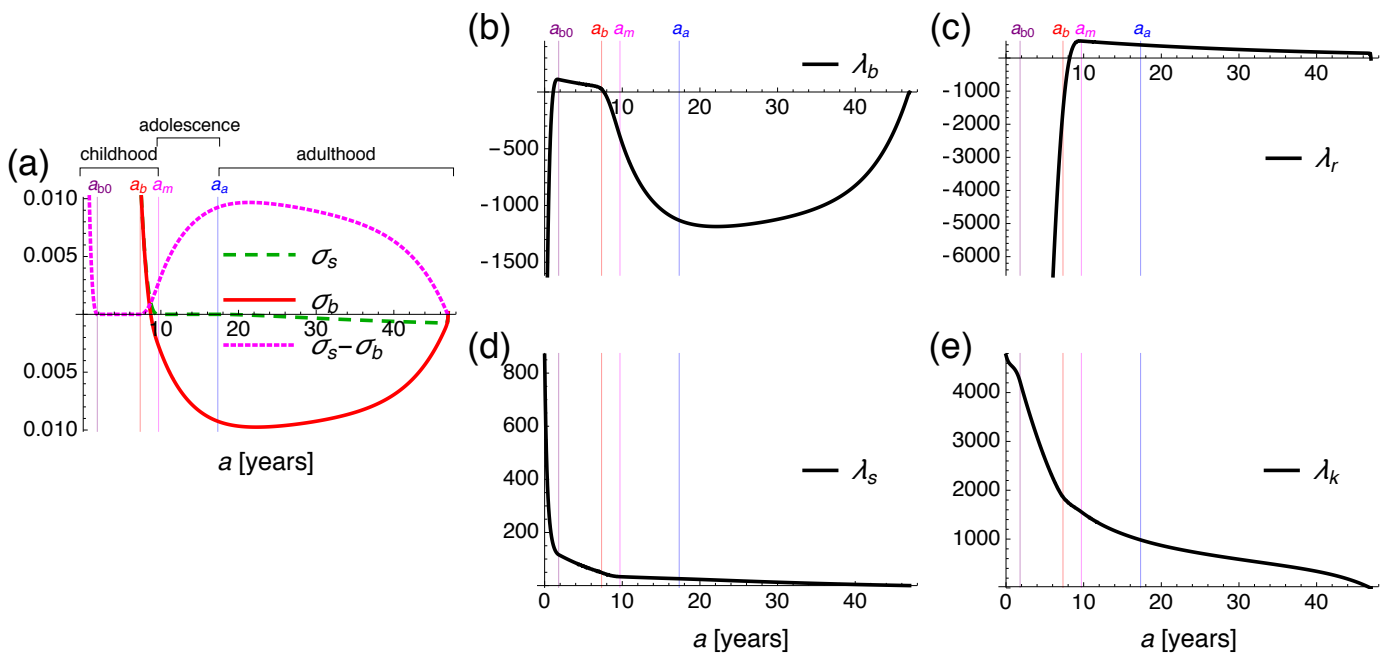

212

213 Figure S2: Switching functions and costates for the process in Fig. 1. GPOPS yields the costates  $\lambda_i$  using a direct  
 214 approach rather than the Pontryagin maximum principle (Patterson and Rao, 2014). The switching functions  
 215  $\sigma_i$  are calculated using (S23).

219 In section 4 we show that for the singular arcs and assuming the denominators are non-zero, the candidate  
220 optimal controls are

$$\text{Regime BS: } \hat{u}_b(\mathbf{x}^*, \lambda, a) = \frac{\rho_{sk} - \chi_{/sk}^{sb}}{\chi_{bsk}^{sb}} \quad (\text{S32a})$$

$$\text{Regime BR: } \hat{u}_b(\mathbf{x}^*, \lambda, a) = \frac{\rho_{rk} - \chi_{/rk}^{br}}{\chi_{brk}^{br}} \quad (\text{S32b})$$

$$\text{Regime RS: } \hat{u}_s(\mathbf{x}^*, \lambda, a) = \frac{\rho_{rs} - \chi_{/r/}^{sr}}{\chi_{sr/}^{sr}} \quad (\text{S32c})$$

$$\text{Regime BRS: } \hat{u}_s(\mathbf{x}^*, \lambda, a) = \frac{(\rho_{rs} - \chi_{/sk}^{sr})\chi_{brk}^{br} - (\rho_{rk} - \chi_{/rk}^{br})\chi_{br/}^{sr}}{\chi_{sr/}^{sr}\chi_{brk}^{br} - \chi_{br/}^{sr}\chi_{srk}^{br}} \quad (\text{S32d})$$

$$\hat{u}_b(\mathbf{x}^*, \lambda, a) = \frac{(\rho_{rk} - \chi_{/rk}^{br})\chi_{sr/}^{sr} - (\rho_{rs} - \chi_{/r/}^{sr})\chi_{srk}^{br}}{\chi_{sr/}^{sr}\chi_{brk}^{br} - \chi_{br/}^{sr}\chi_{srk}^{br}}. \quad (\text{S32e})$$

221 Here we have

$$\chi_{ijk}^{lm}(\mathbf{x}^*, \lambda, a) = \frac{e_j \lambda_j}{x_T} [\psi \omega_{ij}(e_l - e_m) + \theta_0 \psi_k \eta_{ij} d_1] \quad (\text{S33a})$$

$$\rho_{jk}(\mathbf{x}^*, \lambda, a) = \theta_1 (\theta_2 d_1 d_2 \lambda_k (e_b B_b - d_2)) \quad (\text{S33b})$$

$$+ e_j \lambda_j \{e_j \psi_j [e_j \psi_j - \theta_2 (e_b \psi_b + d_1 \psi_k) - \hat{\theta}_2 e_s \psi_s] - \theta_2 d_1 \psi_k (e_b B_b - d_2)\} \quad (\text{S33c})$$

$$+ \theta_3 f_0 e^{-\mu a} [\mu + (e_j \psi_j - \theta_2 e_b \psi_b - \hat{\theta}_2 e_s \psi_s)], \quad (\text{S33d})$$

222 for  $i, j, k, l, m \in \{b, r, s, k\}$ , and a subscript “/” in  $\chi_{ijk}^{lm}$  in (S32) denotes a removed subscript. In turn, functions  
223 defining the  $\chi_{ijk}^{lm}$ ’s and  $\rho_{jk}$ ’s functions are

$$\omega_{sr}(\mathbf{x}^*, a) = B_{\text{syn}}(\mathbf{x}^*, a)(\beta - 1)(e_s - e_r) \quad (\text{S34a})$$

$$\omega_{br}(\mathbf{x}^*, a) = B_{\text{syn}}(\mathbf{x}^*, a) \left[ (\beta - 1)(e_b - e_r) + \gamma d_1 \frac{x_T(\mathbf{x}^*)}{\delta(x_k^*)} (1 - p(x_k^*, a)) \right] \quad (\text{S34b})$$

$$\omega_r(\mathbf{x}^*, a) = B_{\text{syn}}(\mathbf{x}^*, a)(\beta - 1)e_r + \gamma \frac{x_T(\mathbf{x}^*)}{\delta(x_k^*)} \xi(\mathbf{x}^*) (1 - p(x_k^*, a)) - \frac{x_T(\mathbf{x}^*)}{c(x_k^*)} p(x_k^*, a) \varphi_r \varphi(a) \quad (\text{S34c})$$

$$\eta_{sr}(\mathbf{x}^*, a) = \beta B_{\text{syn}}(\mathbf{x}^*, a)(e_s - e_r) \quad (\text{S34d})$$

$$\eta_{br}(\mathbf{x}^*, a) = B_{\text{syn}}(\mathbf{x}^*, a) \left\{ \beta(e_b - e_r) + \frac{x_T(\mathbf{x}^*)}{\delta(x_k^*)} d_1 [\gamma(1 - 2p(x_k^*, a)) - \hat{\delta}] \right\} \quad (\text{S34e})$$

$$\eta_r(\mathbf{x}^*, a) = \beta B_{\text{syn}}(\mathbf{x}^*, a)e_r + \frac{x_T(\mathbf{x}^*)}{\delta(x_k^*)} \xi(\mathbf{x}^*) [\gamma(1 - 2p(x_k^*, a)) - \hat{\delta}] + x_T(\mathbf{x}^*) \varphi_r \varphi(a) \left( \frac{1}{\alpha - \varphi(a)} - 2 \frac{p(x_k^*, a)}{c(x_k^*)} \right), \quad (\text{S34f})$$

224 where

$$\omega_{bs}(\mathbf{x}^*, a) = \omega_{br} - \omega_{sr} \quad (\text{S35a})$$

$$\omega_s(\mathbf{x}^*, a) = \omega_{sr} + \omega_r \quad (\text{S35b})$$

$$\eta_{bs}(\mathbf{x}^*, a) = \eta_{br} - \eta_{sr} \quad (\text{S35c})$$

$$\eta_s(\mathbf{x}^*, a) = \eta_{sr} + \eta_r. \quad (\text{S35d})$$

225 Finally, to complete the specification of (S32), we have

$$\theta_0 = \begin{cases} 0, & \text{if } (l, m) = (s, r) \\ -1, & \text{if } (l, m) = (s, b) ; \\ 1, & \text{otherwise} \end{cases} \quad (\text{S36a})$$

$$\theta_1 = \begin{cases} 1, & \text{if } (j, k) = (s, k) \\ -1, & \text{if } (j, k) = (r, k), (r, s) \end{cases} ; \quad \theta_2 = \begin{cases} 1, & \text{if } (j, k) = (s, k), (r, k) \\ 0, & \text{if } (j, k) = (r, s) \end{cases} \quad (\text{S36b})$$

$$\hat{\theta}_2 = \begin{cases} 0, & \text{if } (j, k) = (s, k), (r, k) \\ 1, & \text{if } (j, k) = (r, s) \end{cases} ; \quad \theta_3 = \begin{cases} 0, & \text{if } (j, k) = (s, k) \\ 1, & \text{if } (j, k) = (r, k), (r, s). \end{cases} \quad (\text{S36c})$$

226 The analytical solutions for the candidate optimal controls given by Table S1 and (S32) are functions of the  
 227 candidate optimal states  $\mathbf{x}^*$  and costates  $\lambda$ , which we have not specified analytically. To assess if these analyti-  
 228 cal candidate optimal controls are indeed optimal, we compare them to optimal controls found numerically by  
 229 GPOPS (Patterson and Rao, 2014) (Fig. 1a,e). GPOPS uses a direct approach to solve optimal control problems  
 230 by iterating varying controls and determining which improves maximization of the objective (Patterson and  
 231 Rao, 2014), rather than the indirect approach of the Pontryagin maximum principle via necessary conditions  
 232 for optimality (see Diehl *et al.* (2006) for a comparison of direct and indirect solution approaches to optimal  
 233 control problems). From the numerical solutions given by GPOPS, we obtain optimal states and their costates  
 234 which are part of the output given by GPOPS (Fig. S2b-e). Feeding these numerically obtained optimal states  
 235 and costates to the expressions for the analytical candidate optimal control, we plot in Fig. S3 the analytical  
 236 solutions for the candidate optimal controls given by Table S1 and (S32). Comparison with Fig. 1a,e shows that  
 237 the analytical candidate optimal controls closely follow the controls found numerically by GPOPS.

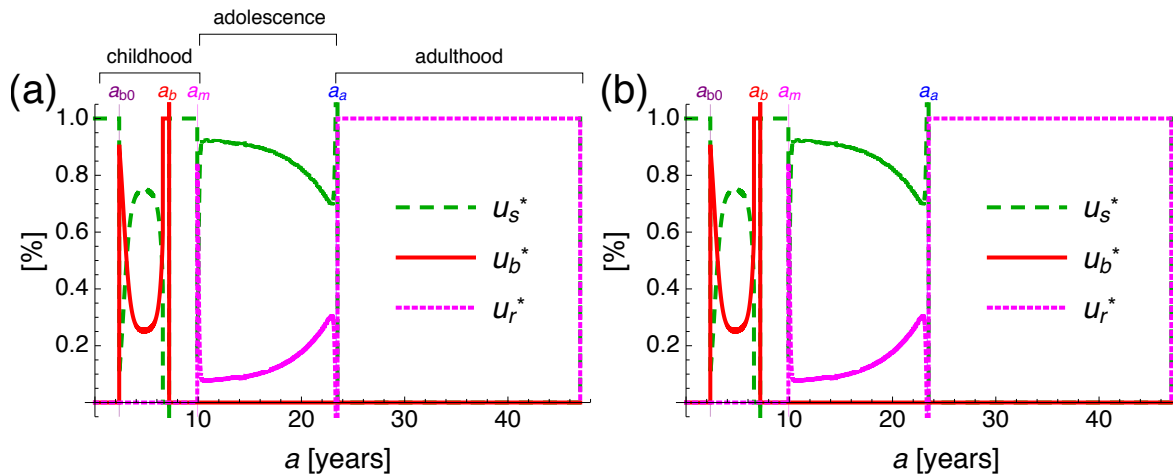

238

239 Figure S3: Plots of the analytically found candidate optimal controls. (a) is for the power competence case in  
 240 Fig. 1a-d. (b) is for the exponential competence case in Fig. 1e-h. Near the switching points between regimes  
 241 ( $a_{b0}, a_b, a_m, a_a$ ), the analytically found controls can be greater than one or smaller than zero, possibly due to  
 242 negligible numerical error in the location of the switching points.

## 243 4 Derivation of analytical results

244 Here we derive the expressions for  $\hat{u}_b(\mathbf{x}^*, \lambda, t)$  and  $\hat{u}_s(\mathbf{x}^*, \lambda, t)$  during the singular arcs given by (S32). To do so,  
 245 we make use of the well-known result, according to which  $\hat{u}_b$  and  $\hat{u}_s$  can be obtained from the age derivatives  
 246 of the switching functions up to some even, but not odd, order (Kelley *et al.*, 1967). Note that during singular  
 247 arcs, either  $\sigma_i = 0$  for some  $i$  or the difference  $\sigma_s - \sigma_b = 0$ , and hence their age derivatives also equal zero during  
 248 the singular arcs. We thus obtain the singular controls by taking second age derivatives of these functions, but  
 249 before doing so, we obtain expressions that will be useful.

250 By differentiating (S31d) and (S31c) with respect to age, we obtain

$$\dot{\psi}(\mathbf{u}^*, \mathbf{x}^*, a) = \frac{\psi}{x_T} (u_s^* \omega_{sr} + u_b^* \omega_{br} + \omega_r) \quad (\text{S37a})$$

$$\dot{\psi}_k(\mathbf{u}^*, \mathbf{x}^*, a) = \frac{\psi_k}{x_T} (u_s^* \eta_{sr} + u_b^* \eta_{br} + \eta_r). \quad (\text{S37b})$$

251 From (S27), taking the second age derivatives for the costates and noting that  $\dot{\psi}_i = \dot{\psi}$  for  $i \in \{b, r, s\}$ , we find

$$\ddot{\lambda}_b = -(\phi \dot{\psi} + \dot{\phi} \psi_b + \dot{\lambda}_k d_1 B_b) \quad (\text{S38a})$$

$$\ddot{\lambda}_r = -[\phi \dot{\psi} + \dot{\phi} \psi_r - f_0 \mu e^{-\mu a}] \quad (\text{S38b})$$

$$\ddot{\lambda}_s = -(\phi \dot{\psi} + \dot{\phi} \psi_s) \quad (\text{S38c})$$

$$\ddot{\lambda}_k = -(\phi \dot{\psi}_k + \dot{\phi} \psi_k - \dot{\lambda}_k d_2). \quad (\text{S38d})$$

### 252 4.1 Singular controls for regime BS: $\sigma_s > 0$ , $\sigma_b > 0$ , and $\sigma_s = \sigma_b$

253 We now obtain the singular controls for growth regime BS. The procedure is essentially the same for growth  
 254 regimes BR, RS, and BRS.

255 For regime BS, we have the singular arc where  $(u_b^*, u_s^*) = (\hat{u}_b, 1 - \hat{u}_b)$  and  $\sigma_s = \sigma_b$ . Hence, from (S22a),  
 256 during regime BS the variable  $\phi$  in the Hamiltonian (S21) is no longer an explicit function of the controls:

$$\begin{aligned} \phi(\lambda) &= (1 - \hat{u}_b) \sigma_s + \hat{u}_b \sigma_s + e_r \lambda_r \\ &= \sigma_s + e_r \lambda_r \\ &= e_s \lambda_s. \end{aligned} \quad (\text{S39a})$$

257 From (S37), we also have the simplifications

$$\dot{\psi}(\mathbf{u}^*, \mathbf{x}^*, a) = \frac{\psi}{x_T} (\hat{u}_b \omega_{bs} + \omega_s) \quad (\text{S39b})$$

$$\dot{\psi}_k(\mathbf{u}^*, \mathbf{x}^*, a) = \frac{\psi_k}{x_T} (\hat{u}_b \eta_{bs} + \eta_s). \quad (\text{S39c})$$

258 Since  $\sigma_s - \sigma_b = 0$ , we have that  $\ddot{\sigma}_s - \ddot{\sigma}_b = 0$ , which using (S25), (S38), and (S39) becomes

$$e_s \ddot{\lambda}_s - e_b \ddot{\lambda}_b - d_1 \ddot{\lambda}_k = 0 \quad (\text{S40a})$$

$$-e_s (\phi \dot{\psi} + \dot{\phi} \psi_s) + e_b (\phi \dot{\psi} + \dot{\phi} \psi_b + \dot{\lambda}_k d_1 B_b) + d_1 (\phi \dot{\psi}_k + \dot{\phi} \psi_k - \dot{\lambda}_k d_2) = 0 \quad (\text{S40b})$$

$$\dot{\psi}(\mathbf{u}^*, \mathbf{x}^*, a) \phi(\lambda) (e_b - e_s) + \dot{\psi}_k(\mathbf{u}^*, \mathbf{x}^*, a) \phi(\lambda) d_1 + \rho_{sk}(\mathbf{x}^*, \lambda, a) = 0, \quad (\text{S40c})$$



259 where

$$\rho_{sk}(\mathbf{x}^*, \boldsymbol{\lambda}, a) = \dot{\lambda}_k d_1 (e_b B_b - d_2) - \dot{\phi} (e_s \psi_s - e_b \psi_b - d_1 \psi_k) \quad (\text{S41a})$$

$$= d_1 d_2 \lambda_k (e_b B_b - d_2) + e_s \lambda_s [e_s \psi_s (e_s \psi_s - e_b \psi_b - d_1 \psi_k) - d_1 \psi_k (e_b B_b - d_2)]. \quad (\text{S41b})$$

260 Here  $\dot{\lambda}_k$  during the singular arc BS is similarly not an explicit function of the controls.

261 In (S40c), only  $\dot{\psi}$  and  $\dot{\psi}_k$  are functions of  $\mathbf{u}^*$ . Expanding these terms in (S40c), we obtain an affine equation  
262 in the singular control  $\hat{u}_b$ :

$$\left[ \frac{\psi}{x_T} (\hat{u}_b \omega_{bs} + \omega_s) \right] \phi (e_b - e_s) + \left[ \frac{\psi_k}{x_T} (\hat{u}_b \eta_{bs} + \eta_s) \right] \phi d_1 + \rho_{sk} = 0 \quad (\text{S42a})$$

$$-\hat{u}_b \zeta_{bsk}(\mathbf{x}^*, \boldsymbol{\lambda}, a) + \zeta_{sk}(\mathbf{x}^*, \boldsymbol{\lambda}, a) = 0, \quad (\text{S42b})$$

263 where

$$\begin{aligned} \zeta_{bsk}(\mathbf{x}^*, \boldsymbol{\lambda}, a) &= \frac{\phi}{x_T} [\psi \omega_{bs} (e_s - e_b) - \psi_k \eta_{bs} d_1] \\ &= \frac{e_s \lambda_s}{x_T} [\psi \omega_{bs} (e_s - e_b) - \psi_k \eta_{bs} d_1] \end{aligned} \quad (\text{S43a})$$

$$\begin{aligned} \zeta_{sk}(\mathbf{x}^*, \boldsymbol{\lambda}, a) &= \rho_{sk} - \frac{\phi}{x_T} [\psi \omega_s (e_s - e_b) - \psi_k \eta_s d_1] \\ &= \rho_{sk} - \frac{e_s \lambda_s}{x_T} [\psi \omega_s (e_s - e_b) - \psi_k \eta_s d_1]. \end{aligned} \quad (\text{S43b})$$

264 Therefore, assuming that  $\zeta_{bsk} \neq 0$ , the singular control for regime BS is

$$\hat{u}_b(\mathbf{x}^*, \boldsymbol{\lambda}, a) = \frac{\zeta_{sk}}{\zeta_{bsk}}. \quad (\text{S44})$$

## 265 4.2 Singular controls for regime BR: $\sigma_s < 0$ and $\sigma_b = 0$

266 For regime BR, we have that  $(u_b^*, u_s^*) = (\hat{u}_b, 0)$ . Hence, from (S22a), during regime BR the variable  $\phi$  is no longer  
267 an explicit function of the controls:

$$\begin{aligned} \phi(\boldsymbol{\lambda}) &= 0 \times \sigma_s + \hat{u}_b \times 0 + e_r \lambda_r \\ &= e_r \lambda_r. \end{aligned} \quad (\text{S45a})$$

268 From (S37), we have the simplifications

$$\dot{\psi}(\mathbf{u}^*, \mathbf{x}^*, a) = \frac{\psi}{x_T} (\hat{u}_b \omega_{br} + \omega_r) \quad (\text{S45b})$$

$$\dot{\psi}_k(\mathbf{u}^*, \mathbf{x}^*, a) = \frac{\psi_k}{x_T} (\hat{u}_b \eta_{br} + \eta_r). \quad (\text{S45c})$$

269 From  $\sigma_b = 0$ , we have that  $\ddot{\sigma}_b = 0$ , which becomes

$$e_b \ddot{\lambda}_b - e_r \ddot{\lambda}_r + d_1 \ddot{\lambda}_k = 0 \quad (\text{S46a})$$

$$-e_b (\phi \dot{\psi} + \dot{\phi} \psi_b + \dot{\lambda}_k d_1 B_b) + e_r (\phi \dot{\psi} + \dot{\phi} \psi_r - f_0 \mu e^{-\mu a}) - d_1 (\phi \dot{\psi}_k + \dot{\phi} \psi_k - \dot{\lambda}_k d_2) = 0 \quad (\text{S46b})$$

$$-\dot{\psi}(\mathbf{u}^*, \mathbf{x}^*, a) \phi(\boldsymbol{\lambda}) (e_b - e_r) - \dot{\psi}_k(\mathbf{u}^*, \mathbf{x}^*, a) \phi(\boldsymbol{\lambda}) d_1 + \rho_{rk}(\mathbf{x}^*, \boldsymbol{\lambda}, a) = 0, \quad (\text{S46c})$$

270 where

$$\rho_{rk}(\mathbf{x}^*, \boldsymbol{\lambda}, a) = -\dot{\lambda}_k d_1 (e_b B_b - d_2) + \dot{\phi} (e_r \psi_r - e_b \psi_b - d_1 \psi_k) - e_r f_0 \mu e^{-\mu a} \quad (\text{S47a})$$

$$\begin{aligned} &= -d_1 d_2 \lambda_k (e_b B_b - d_2) - e_r \lambda_r [e_r \psi_r (e_r \psi_r - e_b \psi_b - d_1 \psi_k) - d_1 \psi_k (e_b B_b - d_2)] \\ &\quad - e_r f_0 e^{-\mu a} [\mu + (e_r \psi_r - e_b \psi_b - d_1 \psi_k)]. \end{aligned} \quad (\text{S47b})$$

271 Again, in (S46c), only  $\dot{\psi}$  and  $\dot{\psi}_k$  are functions of  $\mathbf{u}^*$ . Expanding these terms in (S46c), we similarly obtain  
272 an affine equation in the singular control  $\hat{u}_b$ :

$$-\left[ \frac{\psi}{x_T} (\hat{u}_b \omega_{br} + \omega_r) \right] \phi (e_b - e_r) - \left[ \frac{\psi_k}{x_T} (\hat{u}_b \eta_{br} + \eta_r) \right] \phi d_1 + \rho_{rk} = 0 \quad (\text{S48a})$$

$$-\hat{u}_b \zeta_{brk}(\mathbf{x}^*, \boldsymbol{\lambda}, a) + \zeta_{rk}(\mathbf{x}^*, \boldsymbol{\lambda}, a) = 0, \quad (\text{S48b})$$

273 where

$$\begin{aligned} \zeta_{brk}(\mathbf{x}^*, \boldsymbol{\lambda}, a) &= \frac{\phi}{x_T} [\psi \omega_{br} (e_b - e_r) + \psi_k \eta_{br} d_1] \\ &= \frac{e_r \lambda_r}{x_T} [\psi \omega_{br} (e_b - e_r) + \psi_k \eta_{br} d_1] \end{aligned} \quad (\text{S49a})$$

$$\begin{aligned} \zeta_{rk}(\mathbf{x}^*, \boldsymbol{\lambda}, a) &= \rho_{rk} - \frac{\phi}{x_T} [\psi \omega_r (e_b - e_r) + \psi_k \eta_r d_1] \\ &= \rho_{rk} - \frac{e_r \lambda_r}{x_T} [\psi \omega_r (e_b - e_r) + \psi_k \eta_r d_1]. \end{aligned} \quad (\text{S49b})$$

274 Therefore, assuming that  $\zeta_{brk} \neq 0$ , the singular control for regime BR is

$$\hat{u}_b(\mathbf{x}^*, \boldsymbol{\lambda}, a) = \frac{\zeta_{rk}}{\zeta_{brk}}. \quad (\text{S50})$$

### 275 4.3 Singular controls for regime RS: $\sigma_s = 0$ and $\sigma_b < 0$

276 For regime RS, we have that  $(u_b^*, u_s^*) = (0, \hat{u}_s)$ . Hence, during regime RS the variable  $\phi$  is again no longer an  
277 explicit function of the controls:

$$\begin{aligned} \phi(\boldsymbol{\lambda}) &\equiv \hat{u}_s \times 0 + 0 \times \sigma_b + e_r \lambda_r \\ &= e_r \lambda_r. \end{aligned} \quad (\text{S51a})$$

278 We have the simplifications

$$\dot{\psi}(\mathbf{u}^*, \mathbf{x}^*, a) = \frac{\psi}{x_T} (\hat{u}_s \omega_{sr} + \omega_r) \quad (\text{S51b})$$

$$\dot{\psi}_k(\mathbf{u}^*, \mathbf{x}^*, a) = \frac{\psi_k}{x_T} (\hat{u}_s \eta_{sr} + \eta_r). \quad (\text{S51c})$$

279 From  $\sigma_s = 0$ , we have that  $\ddot{\sigma}_s = 0$ , which becomes

$$e_s \ddot{\lambda}_s - e_r \ddot{\lambda}_r = 0 \quad (\text{S52a})$$

$$-e_s (\phi \dot{\psi} + \dot{\phi} \psi_s) + e_r (\phi \dot{\psi} + \dot{\phi} \psi_r - f_0 \mu e^{-\mu a}) = 0 \quad (\text{S52b})$$

$$-\dot{\psi}(\mathbf{u}, \mathbf{x}, a) \phi(\boldsymbol{\lambda}) (e_s - e_r) + \rho_{rs}(\mathbf{x}^*, \boldsymbol{\lambda}, a) = 0, \quad (\text{S52c})$$

280 where

$$\begin{aligned}\rho_{rs}(\mathbf{x}^*, \boldsymbol{\lambda}, a) &= \dot{\phi}(e_r \psi_r - e_s \psi_s) - e_r f_0 \mu e^{-\mu a} \\ &= -e_r \lambda_r [e_r \psi_r (e_r \psi_r - e_s \psi_s)] - e_r f_0 e^{-\mu a} [\mu + (e_r \psi_r - e_s \psi_s)].\end{aligned}\quad (\text{S53})$$

281 Once again, only  $\psi$  is a function of  $\mathbf{u}^*$  in (S52c). Expanding this term in (S52c), we obtain an affine equation  
282 in the singular control  $\hat{u}_s$ :

$$-\left[ \frac{\psi}{x_T} (\hat{u}_s \omega_{sr} + \omega_r) \right] \phi(e_s - e_r) + \rho_r = 0 \quad (\text{S54a})$$

$$-\hat{u}_s \zeta_{sr}(\mathbf{x}^*, \boldsymbol{\lambda}, a) + \zeta_r(\mathbf{x}^*, \boldsymbol{\lambda}, a) = 0, \quad (\text{S54b})$$

283 where we define

$$\begin{aligned}\zeta_{sr}(\mathbf{x}^*, \boldsymbol{\lambda}, a) &= \phi \frac{\psi}{x_T} \omega_{sr} (e_s - e_r) \\ &= \frac{e_r \lambda_r}{x_T} \psi \omega_{sr} (e_s - e_r)\end{aligned}\quad (\text{S55a})$$

$$\begin{aligned}\zeta_r(\mathbf{x}^*, \boldsymbol{\lambda}, a) &= \rho_{rs} - \phi \frac{\psi}{x_T} \omega_r (e_s - e_r) \\ &= \rho_{rs} - \frac{e_r \lambda_r}{x_T} \psi \omega_r (e_s - e_r).\end{aligned}\quad (\text{S55b})$$

284 Therefore, assuming that  $\zeta_{sr} \neq 0$ , the singular control for regime RS is

$$\hat{u}_s(\mathbf{x}^*, \boldsymbol{\lambda}, a) = \frac{\zeta_r}{\zeta_{sr}}. \quad (\text{S56})$$

#### 285 4.4 Singular controls for regime BRS: $\sigma_s = \sigma_b = 0$

286 For regime BRS, we have that  $(u_b^*, u_s^*) = (\hat{u}_b, \hat{u}_s)$ . As before, the variable  $\phi$  is no longer an explicit function of  
287 the controls:

$$\begin{aligned}\phi(\boldsymbol{\lambda}) &= \hat{u}_s \times 0 + \hat{u}_b \times 0 + e_r \lambda_r \\ &= e_r \lambda_r.\end{aligned}\quad (\text{S57a})$$

288 Similarly, we have the simplifications

$$\dot{\psi}(\mathbf{u}^*, \mathbf{x}^*, a) = \frac{\psi}{x_T} (\hat{u}_s \omega_{sr} + \hat{u}_b \omega_{br} + \omega_r) \quad (\text{S57b})$$

$$\dot{\psi}_k(\mathbf{u}^*, \mathbf{x}^*, a) = \frac{\psi_k}{x_T} (\hat{u}_s \eta_{sr} + \hat{u}_b \eta_{br} + \eta_r). \quad (\text{S57c})$$

289 From  $\sigma_s = 0$ , we have that  $\ddot{\sigma}_s = 0$ , which is

$$e_s \ddot{\lambda}_s - e_r \ddot{\lambda}_r = 0 \quad (\text{S58a})$$

$$-e_s (\phi \dot{\psi} + \dot{\phi} \psi_s) + e_r [\phi \dot{\psi} + \dot{\phi} \psi_r - f_0 \mu e^{-\mu a}] = 0 \quad (\text{S58b})$$

$$\dot{\psi}(\mathbf{u}^*, \mathbf{x}^*, a) \phi(\boldsymbol{\lambda}) (e_r - e_s) + \rho_{rs}(\mathbf{x}^*, \boldsymbol{\lambda}, a) = 0, \quad (\text{S58c})$$

290 where as before

$$\begin{aligned}\rho_{rs}(\mathbf{x}^*, \boldsymbol{\lambda}, a) &= \dot{\phi}(e_r \psi_r - e_s \psi_s) - e_r f_0 \mu e^{-\mu a} \\ &= -e_r \lambda_r [e_r \psi_r (e_r \psi_r - e_s \psi_s)] - e_r f_0 e^{-\mu a} [\mu + (e_r \psi_r - e_s \psi_s)].\end{aligned}\quad (\text{S59})$$

291 Expanding  $\psi$  in (S58c), we obtain an affine equation in the two controls  $\hat{u}_s$  and  $\hat{u}_b$ :

$$\left[ \frac{\psi}{x_T} (\hat{u}_s \omega_{sr} + \hat{u}_b \omega_{br} + \omega_r) \right] \phi(e_r - e_s) + \rho_{rs} = 0 \quad (S60a)$$

$$-\hat{u}_s \zeta_{sr}(\mathbf{x}^*, \boldsymbol{\lambda}, a) - \hat{u}_b \zeta_{br}(\mathbf{x}^*, \boldsymbol{\lambda}, a) + \zeta_r(\mathbf{x}^*, \boldsymbol{\lambda}, a) = 0, \quad (S60b)$$

292 where

$$\begin{aligned} \zeta_{sr}(\mathbf{x}^*, \boldsymbol{\lambda}, a) &= -\phi \frac{\psi}{x_T} \omega_{sr} (e_r - e_s) \\ &= \frac{e_r \lambda_r}{x_T} \psi \omega_{sr} (e_s - e_r) \end{aligned} \quad (S61a)$$

$$\begin{aligned} \zeta_{br}(\mathbf{x}^*, \boldsymbol{\lambda}, a) &= -\phi \frac{\psi}{x_T} \omega_{br} (e_r - e_s) \\ &= \frac{e_r \lambda_r}{x_T} \psi \omega_{br} (e_s - e_r) \end{aligned} \quad (S61b)$$

$$\begin{aligned} \zeta_r(\mathbf{x}^*, \boldsymbol{\lambda}, a) &= \rho_{rs} + \phi \frac{\psi}{x_T} \omega_r (e_r - e_s) \\ &= \rho_{rs} - \frac{e_r \lambda_r}{x_T} \psi \omega_r (e_s - e_r). \end{aligned} \quad (S61c)$$

293 Now, from  $\sigma_b = 0$ , we have that  $\dot{\sigma}_b = 0$ , which is

$$e_b \lambda_b - e_r \lambda_r + d_1 \lambda_k = 0 \quad (S62a)$$

$$-e_b (\phi \dot{\psi} + \dot{\phi} \psi_b + \dot{\lambda}_k d_1 B_b) + e_r [\phi \dot{\psi} + \dot{\phi} \psi_r - \mu e^{-\mu a}] - d_1 (\phi \dot{\psi}_k + \dot{\phi} \psi_k - \dot{\lambda}_k d_2) = 0 \quad (S62b)$$

$$-\dot{\psi}(\mathbf{u}^*, \mathbf{x}^*, a) \phi(\boldsymbol{\lambda}) (e_b - e_r) - \dot{\psi}_k(\mathbf{u}^*, \mathbf{x}^*, a) \phi(\boldsymbol{\lambda}) d_1 + \rho_{rk}(\mathbf{x}^*, \boldsymbol{\lambda}, a) = 0, \quad (S62c)$$

294 where as before

$$\rho_{rk}(\mathbf{x}^*, \boldsymbol{\lambda}, a) = -\dot{\lambda}_k d_1 (e_b B_b - d_2) + \dot{\phi} (e_r \psi_r - e_b \psi_b - d_1 \psi_k) - e_r f_0 \mu e^{-\mu a} \quad (S63a)$$

$$\begin{aligned} &= -d_1 d_2 \dot{\lambda}_k (e_b B_b - d_2) - e_r \lambda_r [e_r \psi_r (e_r \psi_r - e_b \psi_b - d_1 \psi_k) - d_1 \psi_k (e_b B_b - d_2)] \\ &\quad - e_r f_0 e^{-\mu a} [\mu + (e_r \psi_r - e_b \psi_b - d_1 \psi_k)]. \end{aligned} \quad (S63b)$$

295 Expanding  $\psi$  and  $\dot{\psi}_k$  in (S62c), we obtain another affine equation in the two controls  $\hat{u}_s$  and  $\hat{u}_b$ :

$$-\left[ \frac{\psi}{x_T} (\hat{u}_s \omega_{sr} + \hat{u}_b \omega_{br} + \omega_r) \right] \phi(e_b - e_r) - \left[ \frac{\psi_k}{x_T} (\hat{u}_s \eta_{sr} + \hat{u}_b \eta_{br} + \eta_r) \right] \phi d_1 + \rho_{rk} = 0 \quad (S64a)$$

$$-\hat{u}_s \zeta_{srk}(\mathbf{x}^*, \boldsymbol{\lambda}, a) - \hat{u}_b \zeta_{brk}(\mathbf{x}^*, \boldsymbol{\lambda}, a) + \zeta_{rk}(\mathbf{x}^*, \boldsymbol{\lambda}, a) = 0, \quad (S64b)$$

296 where

$$\begin{aligned} \zeta_{srk}(\mathbf{x}^*, \boldsymbol{\lambda}, a) &= \frac{\phi}{x_T} [\psi \omega_{sr} (e_b - e_r) + \psi_k \eta_{sr} d_1] \\ &= \frac{e_r \lambda_r}{x_T} [\psi \omega_{sr} (e_b - e_r) + \psi_k \eta_{sr} d_1] \end{aligned} \quad (S65a)$$

$$\begin{aligned} \zeta_{brk}(\mathbf{x}^*, \boldsymbol{\lambda}, a) &= \frac{\phi}{x_T} [\psi \omega_{br} (e_b - e_r) + \psi_k \eta_{br} d_1] \\ &= \frac{e_r \lambda_r}{x_T} [\psi \omega_{br} (e_b - e_r) + \psi_k \eta_{br} d_1] \end{aligned} \quad (S65b)$$

$$\begin{aligned} \zeta_{rk}(\mathbf{x}^*, \boldsymbol{\lambda}, a) &= \rho_{rk} - \frac{\phi}{x_T} [\psi \omega_r (e_b - e_r) + \psi_k \eta_r d_1] \\ &= \rho_{rk} - \frac{e_r \lambda_r}{x_T} [\psi \omega_r (e_b - e_r) + \psi_k \eta_r d_1]. \end{aligned} \quad (S65c)$$

297 Therefore, solving (S60b) and (S64b) and assuming that  $\zeta_{sr}\zeta_{brk} - \zeta_{br}\zeta_{srk} \neq 0$ , the singular controls for regime  
298 BRS are

$$\hat{u}_s(\mathbf{x}^*, \boldsymbol{\lambda}, a) = \frac{\zeta_r\zeta_{brk} - \zeta_{br}\zeta_{rk}}{\zeta_{sr}\zeta_{brk} - \zeta_{br}\zeta_{srk}} \quad (\text{S66a})$$

$$\hat{u}_b(\mathbf{x}^*, \boldsymbol{\lambda}, a) = \frac{\zeta_{sr}\zeta_{rk} - \zeta_r\zeta_{srk}}{\zeta_{sr}\zeta_{brk} - \zeta_{br}\zeta_{srk}}. \quad (\text{S66b})$$

## 299 5 Parameter values

300 Here we summarize the values of the 22 parameters used in numerical solutions. From these, 13 parameters  
 301 are estimated as described in section 6 and they refer to newborn mass, tissue metabolism, and demography  
 302 (Table S2). The estimates of  $E_i$  for are less accurate than those of  $B_i$  for  $i \in \{b, s, r\}$  as they require stronger  
 303 assumptions given the available data (see Moses *et al.* (2008)). Since the parameter  $f_0$  only displaces the ob-  
 304 jective vertically and thus has no effect on the solution, we choose its value to scale the objective  $R_0$  (Table S2).  
 305 The remaining 8 parameters refer to skill metabolism, contest success, and (allo)parental care, for which we  
 306 use values that produce body and brain mass that closely approach ontogenetic modern human data. Hence,  
 307 we use different benchmark values with either power (Table S3) or exponential (Table S4) competence.

| Newborn mass |          | Tissue metabolism |                                                          |         |                                        | Demography |                                                           |
|--------------|----------|-------------------|----------------------------------------------------------|---------|----------------------------------------|------------|-----------------------------------------------------------|
|              |          | $K$               | $132.7281 \frac{\text{MJ}}{\text{y}} \text{kg}^{-\beta}$ | $\beta$ | 0.7378                                 |            |                                                           |
| 308          | $x_s(0)$ | $B_s$             | $29.6891 \frac{\text{MJ}}{\text{y} \times \text{kg}}$    | $E_s$   | $12.4594 \frac{\text{MJ}}{\text{kg}}$  | $f_0$      | $10 \frac{\text{\#offspring}}{\text{kg} \times \text{y}}$ |
|              | $x_b(0)$ | $B_b$             | $313.0962 \frac{\text{MJ}}{\text{y} \times \text{kg}}$   | $E_b$   | $123.7584 \frac{\text{MJ}}{\text{kg}}$ | $\mu$      | $0.034 \frac{1}{\text{y}}$                                |
|              | $x_r(0)$ | $B_r$             | $2697.1179 \frac{\text{MJ}}{\text{y} \times \text{kg}}$  | $E_r$   | $190.8196 \frac{\text{MJ}}{\text{kg}}$ | $\tau$     | 47 y                                                      |

Table S2: Estimated parameter values and  $f_0$ , which is set to an arbitrary value.

### 309 For power competence:

| Skill metabolism |         | Contest success                                     |          | (Allo)parental care                    |                      |                          |
|------------------|---------|-----------------------------------------------------|----------|----------------------------------------|----------------------|--------------------------|
| 310              | $\nu_k$ | 0.5                                                 | $\alpha$ | 1 skill <sup><math>\gamma</math></sup> | $\varphi_0 / \alpha$ | 0.6                      |
|                  | $B_k$   | $36 \frac{\text{MJ}}{\text{y} \times \text{skill}}$ | $\gamma$ | 1.4                                    | $\varphi_r$          | $0.2 \frac{1}{\text{y}}$ |
|                  | $E_k$   | $370 \frac{\text{MJ}}{\text{skill}}$                | $x_k(0)$ | 1 skill                                |                      |                          |

311 Table S3: Benchmark parameter values with power competence. The value of  $\varphi_r$  yields (allo)parental care for  
 312  $\approx 20$  years, as observed in forager-horticulturalists (Schniter *et al.*, 2015).

### 313 For exponential competence:

| Skill metabolism |         | Contest success                                     |          | (Allo)parental care      |                      |                          |
|------------------|---------|-----------------------------------------------------|----------|--------------------------|----------------------|--------------------------|
| 314              | $\nu_k$ | 0.5                                                 | $\alpha$ | 1.15                     | $\varphi_0 / \alpha$ | 0.8                      |
|                  | $B_k$   | $50 \frac{\text{MJ}}{\text{y} \times \text{skill}}$ | $\gamma$ | $0.6 \text{ skill}^{-1}$ | $\varphi_r$          | $0.2 \frac{1}{\text{y}}$ |
|                  | $E_k$   | $250 \frac{\text{MJ}}{\text{skill}}$                | $x_k(0)$ | 0 skill                  |                      |                          |

Table S4: Benchmark parameter values with exponential competence.

## 315 6 Estimation of parameter values

316 Here we describe how we obtained the parameter values in Table S2. We use ontogenetic data for modern  
 317 human females published in Table S2 of Kuzawa *et al.* (2014). We denote the observed mass of tissue  $i$  at age  $a$   
 318 as  $X_i(a)$  and their sum as  $X_T(a)$ . Thus, we set  $x_s(0) = X_s(0) = 2.0628$  kg and  $x_b(0) = X_b(0) = 0.3372$  kg (Kuzawa  
 319 *et al.*, 2014). The count of preovulatory ovarian follicles serves as a proxy for measuring female human fertility  
 320 (McGee and Hsueh, 2000), so we take reproductive cells as referring to preovulatory ovarian follicle cells and set  
 321  $x_r(0) = 0$  kg. We also denote by  $A_a$  the observed age at adulthood. Hence,  $X_T(A_a) = 51.1$  kg and  $X_b(A_a) = 1.31$   
 322 kg (Kuzawa *et al.*, 2014). We also have that  $B_{\text{rest}}(A_a) = 1243.4$  kcal/day  $\times$  4184 J/kcal  $\times$  365 d/y = 1898.8707 MJ/y  
 323 (Kuzawa *et al.*, 2014).

### 324 6.1 Values for $B_i$ for $i \in \{b, r, s\}$

325  $B_b$ : Let  $c_1(a)$  be the ratio of glucose uptake by the brain per unit time at age  $a$  divided by the resting metabolic  
 326 rate at that age. Let  $c_2(a)$  be the fraction of brain glucose metabolism that is oxidative. Then, the empirically  
 327 estimated brain metabolic rate at age  $a$  is the product  $B_{\text{rest}}(a)c_1(a)c_2(a)$ .  $c_1(a)$  is obtained from Table S2 of  
 328 Kuzawa *et al.* (2014) and rough estimates of  $c_2(a)$  are obtained from Goyal *et al.* (2014). For adults they are  
 329  $c_1(A_a) = 0.24$  and  $c_2(A_a) = 0.9$  (Kuzawa *et al.*, 2014; Goyal *et al.*, 2014). Hence, we let  
 330  $B_b = B_{\text{rest}}(A_a)c_1(A_a)c_2(A_a)/X_b(A_a) = 313.0962$  MJ/kg/y.

331  $B_r$ : We are unaware of reports of the metabolic rate of preovulatory follicles. Thus, we use the metabolic  
 332 rate of a human oocyte as a proxy. The oxygen consumption by a human oocyte is estimated to be  $0.53 \times$   
 333  $10^{-9}$  l O<sub>2</sub>/h/oocyte (Magnusson *et al.*, 1986). Oxygen consumption can be transformed into power units by  
 334 multiplying by 20.1 kJ/l O<sub>2</sub> (Blaxter, 1989). The mass of a mouse oocyte is 34.6 ng (Abramczuk and Sawicki,  
 335 1974). Assuming that mouse and human oocyte are of similar mass, then  $B_r = 0.53 \times 10^{-9} \frac{\text{l O}_2}{\text{h} \times \text{oocyte}} \times 20.1 \frac{\text{kJ}}{\text{l O}_2} \times$   
 336  $\frac{1 \text{ oocyte}}{34.6 \text{ ng}} \times \frac{24 \text{ h}}{1 \text{ d}} \times \frac{365 \text{ d}}{1 \text{ y}} \times \frac{10^9 \text{ ng}}{1 \text{ g}} \times \frac{1000 \text{ g}}{1 \text{ kg}} \times \frac{1 \text{ MJ}}{1000 \text{ kJ}} = 2697.1179$  MJ/kg/year.

337  $B_s$ : Adult human females have on average about 2 preovulatory follicles at any given age (Dickey *et al.*, 2002).  
 338 A preovulatory follicle has an average diameter of 21.1 mm (O'Herlihy *et al.*, 1980). Approximating the follicle  
 339 dry mass by the dry mass of a spherical cell with such diameter and water content of 60%, then the adult  
 340 mass of reproductive tissue is  $X_r(A_a) = 2$  follicles  $\times \frac{4}{3}\pi \left(\frac{21.1 \text{ mm}}{2}\right)^3 \times \frac{1 \text{ kg H}_2\text{O}}{10^6 \text{ mm}^3 \text{H}_2\text{O}} \times \frac{0.4 \text{ kg dry mass}}{1 \text{ kg H}_2\text{O}} = 3.9349 \times 10^{-3}$  kg.  
 341 Hence,  $X_s(A_a) = X_T(A_a) - X_b(A_a) - X_r(A_a) = 49.7861$  kg.

342 Since at human adulthood there is no growth, it must be the case that  
 343  $B_{\text{rest}}(A_a) = B_{\text{maint}}(A_a) = \sum_{i \in \{b, r, s\}} X_i(A_a)B_i$ . Because we have that  $B_{\text{rest}}(A_a) = 1898.8707$  MJ/y, it follows that  
 344  $B_s = [B_{\text{rest}}(A_a) - B_b X_b(A_a) - B_r X_r(A_a)] / X_s(A_a) = 29.6891$  MJ/kg/y.

### 345 6.2 Values for $E_i$ for $i \in \{b, r, s\}$

346  $E_b$ : We have that brain metabolic rate is  $M_{\text{brain}}(a) = X_b(a)B_b + \dot{X}_b(a)E_b$ . Assuming that at birth most brain  
 347 metabolic rate is due to brain growth, then  $M_{\text{brain}}(0) \approx \dot{X}_b(0)E_b$ . We also have that,  $M_{\text{brain}}(0) = B_{\text{rest}}(0)c_1(0)c_2(0)$   
 348 and that  $B_{\text{rest}}(0) = 166.6132$  MJ/y (Kuzawa *et al.*, 2014),  $c_1(0) = 0.598$  (Kuzawa *et al.*, 2014), and  $c_2(0) \approx 0.9$

349 (Goyal *et al.*, 2014). From the data in Kuzawa *et al.* (2014), we estimate  $\dot{X}_b(0) = 0.7246$  kg/y. Then, we have  
 350  $E_b = M_{\text{brain}}(0) / \dot{X}_b(0) = 123.7584$  MJ/kg.

351  $E_r$ : We have that  $B_{\text{syn}}(a) = \sum_{i \in \{b,r,s\}} \dot{X}_i(a) E_i$ . We assume that shortly before adulthood most growth is repro-  
 352 ductive. So assuming  $\dot{X}_r(A_a - 1) \neq 0$  while  $\dot{X}_{i \neq r}(A_a - 1) \approx 0$ , we have that

$$E_r = \frac{B_{\text{rest}}(A_a - 1) - B_{\text{maint}}(A_a - 1)}{\dot{X}_r(A_a - 1)} \quad (\text{S67a})$$

$$= \frac{B_{\text{rest}}(A_a - 1) - B X_T(A_a - 1)}{\dot{X}_T(A_a - 1)} \quad (\text{S67b})$$

353 We also have that  $B_{\text{rest}}(A_a - 1) = 1328.3 \frac{\text{kcal}}{\text{d}} \times \frac{4184 \text{ J}}{1 \text{ kcal}} \times \frac{365 \text{ d}}{1 \text{ y}} = 2028.5266$  MJ/y,  $X_T(A_a - 1) = 47.4$  kg, and  $\dot{X}_T(A_a - 1) =$   
 354  $1.4$  kg/y (Kuzawa *et al.*, 2014). Then,  $E_r = 190.8196$  MJ/kg.

355  $E_s$ : Again, we have that  $B_{\text{syn}}(a) = \sum_{i \in \{b,r,s\}} \dot{X}_i(a) E_i$ . Assuming that there is no reproductive growth at birth,  
 356 then  $\dot{X}_r(0) = 0$  and so

$$E_s = \frac{B_{\text{rest}}(0) - B_{\text{maint}}(0) - \dot{X}_b(0) E_b}{\dot{X}_s(0)} \quad (\text{S68a})$$

$$\approx \frac{B_{\text{rest}}(0) - \dot{X}_b(0) E_b}{\dot{X}_s(0)}, \quad (\text{S68b})$$

357 assuming that at birth most resting metabolic rate is due to growth so  $B_{\text{rest}}(0) - B_{\text{maint}}(0) \approx B_{\text{rest}}(0)$ . We have  
 358 that  $B_{\text{rest}}(0) = 109.1 \frac{\text{kcal}}{\text{d}} \times \frac{4184 \text{ J}}{1 \text{ kcal}} \times \frac{365 \text{ d}}{1 \text{ y}} = 166.6132$  MJ/y and  $\dot{X}(0) = 6.9$  kg/y (Kuzawa *et al.*, 2014). Since  $\dot{X}_s(0) =$   
 359  $\dot{X}(0) - \dot{X}_b(0)$ , then  $E_s = 12.4594$  MJ/kg.

### 360 6.3 Values for $K$ and $\beta$

361 Using the ontogenetic (averaged) data in Table S2 of Kuzawa *et al.* (2014), where resting metabolic rate is  
 362 measured in well fed individuals, we find that  $B_{\text{rest}}(a) = K X_T(a)^\beta$  with  $K = 132.7281 \frac{\text{MJ}}{\text{y}} \text{kg}^{-\beta}$  and  $\beta = 0.7378$   
 363 ( $R^2 = 0.92$ ) (Fig. S4).

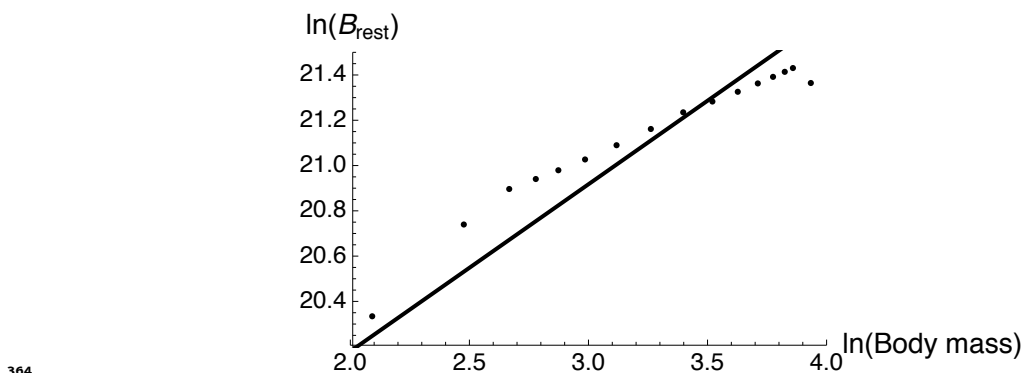

364 Figure S4: Power law approximation of resting metabolic rate with respect to body mass. Dots are ontogenetic  
 365 values of resting metabolic rate vs. body mass in modern humans in a log-log scale (Kuzawa *et al.*, 2014). The  
 366 line is the linear least square regression yielding  $K = 132.7281 \frac{\text{MJ}}{\text{y}} \text{kg}^{-\beta}$  and  $\beta = 0.7378$  ( $R^2 = 0.92$ ).  
 367



#### 368 **6.4 Values for $f_0$ , $\mu$ , and $\tau$**

369 The constant  $f_0$  only multiplies  $R_0$  and thus has not effect on the solution of the optimal control problem. We  
370 thus arbitrarily set it to  $f_0 = 10 \frac{\# \text{offspring}}{\text{kg} \times \text{y}}$ .

371 For traditional hunter-gatherers, the average life expectancy at birth is between 21 and 37 years (Gurven  
372 and Kaplan, 2007). The mid-range life expectancy is thus 29 years. With a constant mortality rate, life ex-  
373 pectancy is  $1/\mu$ . We thus let  $\mu = \frac{1}{29 \text{ y}} = 0.034 \frac{1}{\text{y}}$ .

374 For Hadza and Gainj hunter-gatherers, the average age at menopause is about 47 years (Eaton *et al.*, 1994).  
375 So, we let  $\tau = 47$  years.

## 376 7 Supplementary results

### 377 7.1 Brain metabolic rate through ontogeny

378 With the obtained ESGS, brain metabolic rate is predicted to peak at the age of brain growth arrest, which is  
 379 qualitatively consistent with recent findings for brain glucose intake (Figs. S5a,b and S6a,b; (Kuzawa *et al.*,  
 380 2014)). Brain metabolic rate and brain glucose intake are, however, not equivalent because the former refers  
 381 to oxygen consumption while the latter includes non-oxidative glucose metabolism which is especially high  
 382 during childhood (Kuzawa *et al.*, 2014; Goyal *et al.*, 2014). As observed with brain glucose intake (Kuzawa *et al.*,  
 383 2014), a peak in brain metabolic rate is predicted during mid childhood. The predicted small peak in brain  
 384 metabolic rate results from brain growth arrest (Figs. S5b and S6b) and is enhanced by a peak in allocation to  
 385 brain growth just before brain growth arrest (Figs. 1a,e). The predicted ratio of brain metabolic rate and resting  
 386 metabolic rate is also qualitatively consistent with brain glucose intake in modern humans (Figs. S5c and S6c).

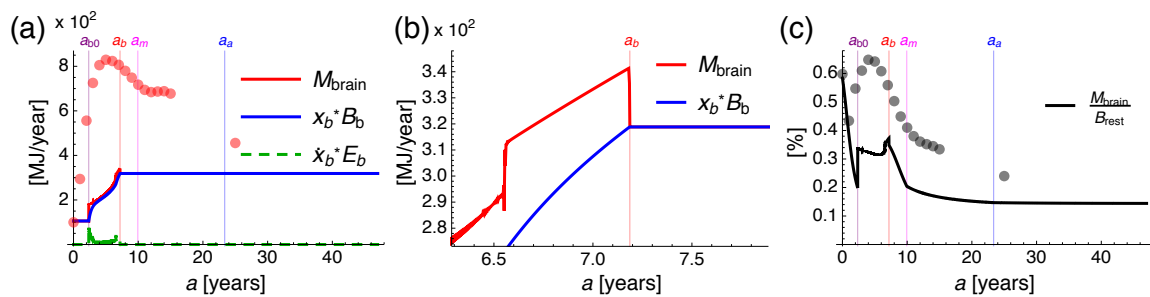

387

388 Figure S5: Predicted and observed brain metabolic patterns in humans qualitatively agree. Plots are for the  
 389 scenario in Fig. 1a-d (power competence). (a) Maintenance (blue;  $x_b^* B_b$ ), growth (green;  $x_b^* E_b$ ), and total (red;  
 390  $M_{\text{brain}}$ ) brain metabolic rates. (b) Brain metabolic rate peaks at the age of brain growth arrest. (c) Ratio of  
 391 brain metabolic rate to resting metabolic rate vs. age. Dots are (a) the energy-equivalent brain glucose intake  
 392 observed in modern human females or (c) the ratio of the latter to resting metabolic rate (Kuzawa *et al.*, 2014).  
 393 A similar pattern is predicted with exponential competence (Fig. S6).

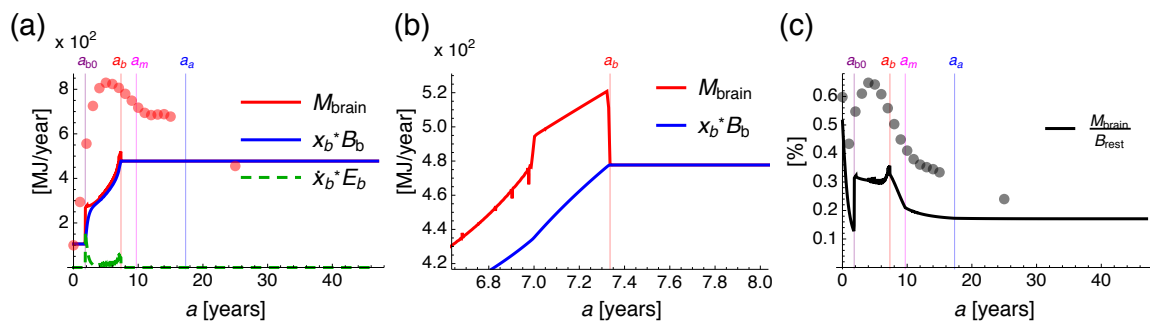

394 Figure S6: Predicted brain metabolic patterns with exponential competence. Plots are for the scenario in Fig.  
 395 1e-h (exponential competence). See legend of Fig. S5.

## 396 7.2 Mass of reproductive tissue

397 For the parameter values of Fig. 1, reproductive tissue mass remains at zero until maturity  $t_m$  and reaches 129  
 398 g (with power competence) or 131 g (with exponential competence) during adulthood, exceeding the 3 g we  
 399 roughly estimate for human females (SI §6.1).

## 400 7.3 Effect of the absence of (allo)parental care

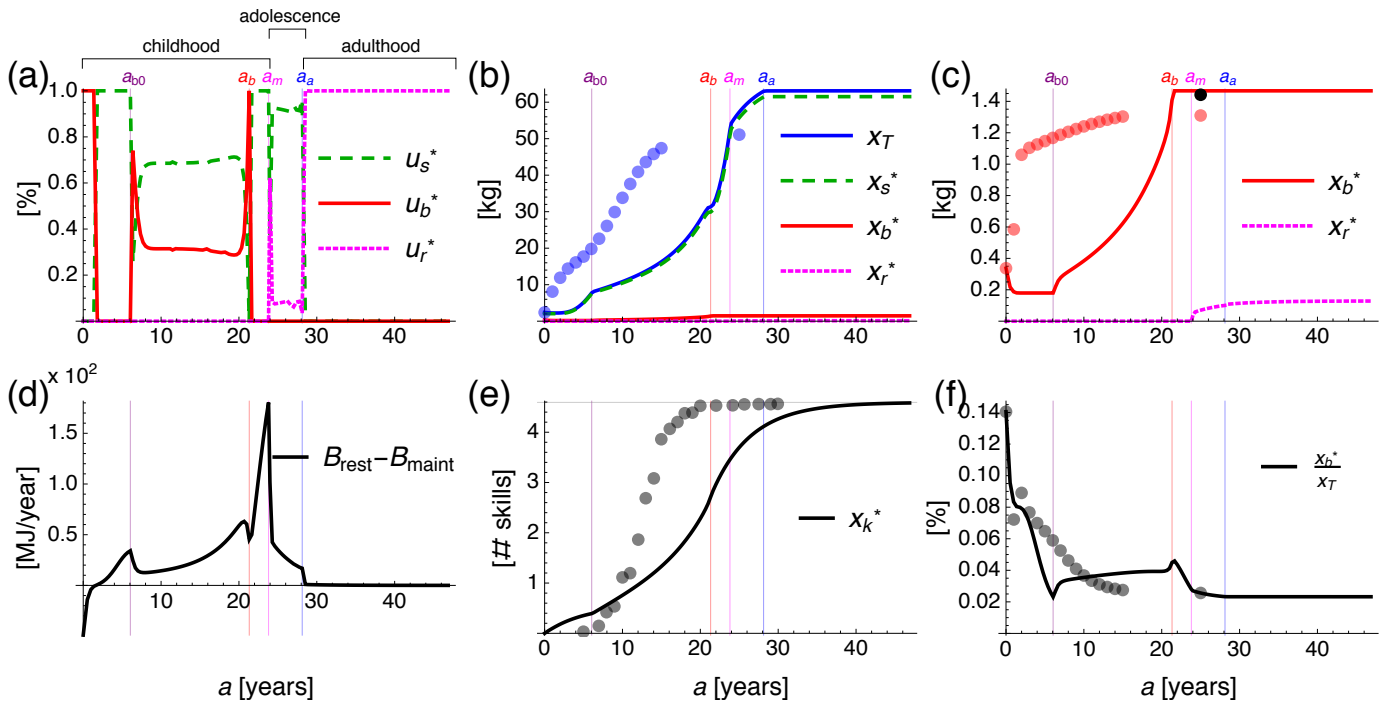

401

402 Figure S7: Effect of the absence of (allo)parental care with exponential competence. Parameters are as in Fig.

403 1e-h, except that here (allo)parental is absent; i.e.,  $\varphi_0 = 0$ .

404 **7.4 Indeterminate skill growth with inexpensive memory**

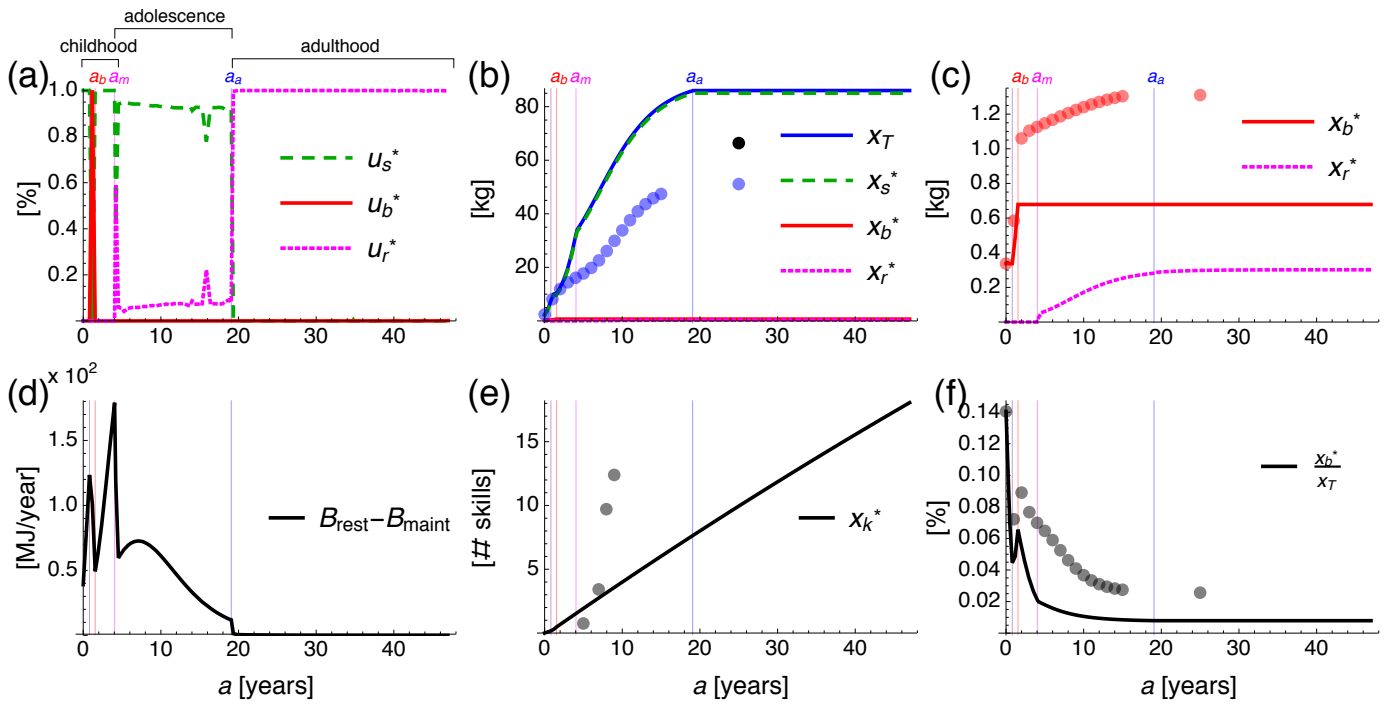

405

406 Figure S8: Indeterminate skill growth with inexpensive memory and exponential competence. Parameters are

407 as in Fig. 1e-h, except that here  $B_k = 1$  MJ/y/skill rather than  $B_k = 50$  MJ/y/skill.

408 **7.5 Large, yet inconsistent-with-data encephalization with exceedingly expensive mem-**  
 409 **ory**

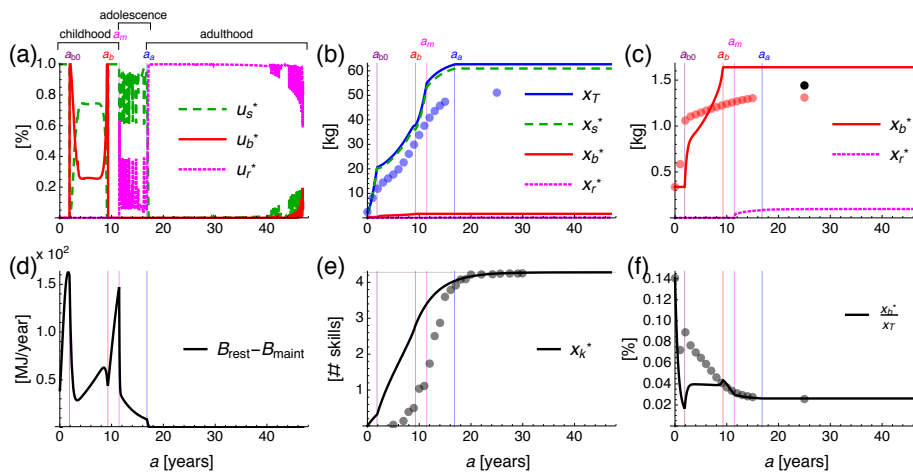

410

411 Figure S9: Larger EQ than that in Fig. 1 with exponential competence, but predicted body mass is less consist-  
 412 tent with observation. Parameters are as in Fig. 1e-h, except that here  $B_k = 60$  MJ/y/skill rather than  $B_k = 50$   
 413 MJ/y/skill. Jitter in the controls indicates that the optimal control problem is computationally challenging for  
 414 GPOPS (this applies to all plots in the main paper and SI).

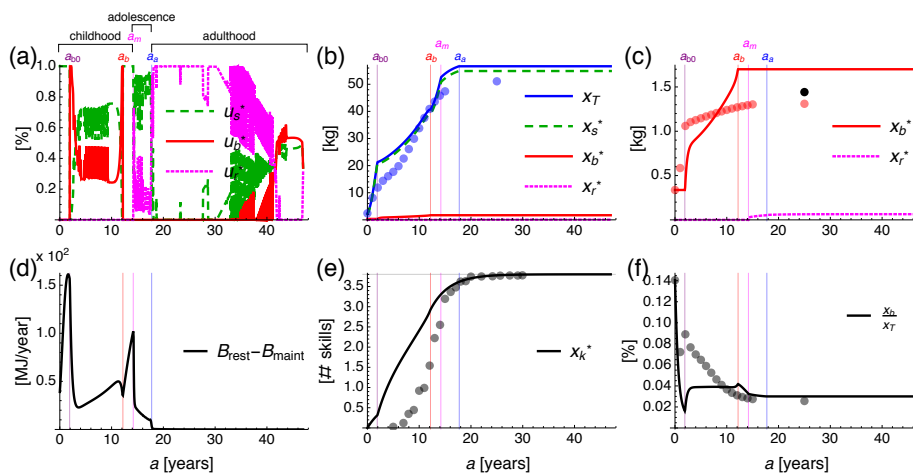

415

416 Figure S10: Larger EQ than that in Fig. 1 with exponential competence, but predicted body mass is less con-  
 417 sistent with observation. Parameters are as in Fig. 1e-h, except that here  $B_k = 70$  MJ/y/skill rather than  $B_k = 50$   
 418 MJ/y/skill.

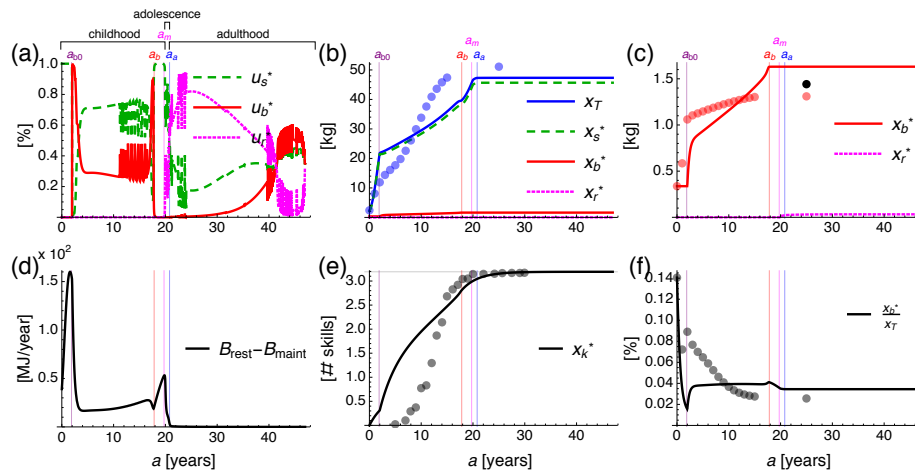

419

420 Figure S11: Larger EQ than that in Fig. 1 with exponential competence, but predicted body mass is less con-  
 421 sistent with observation. Parameters are as in Fig. 1e-h, except that here  $B_k = 80$  MJ/y/skill rather than  $B_k = 50$   
 422 MJ/y/skill.

423 **7.6 Reproduction without growth and body collapse for certain parameter values**

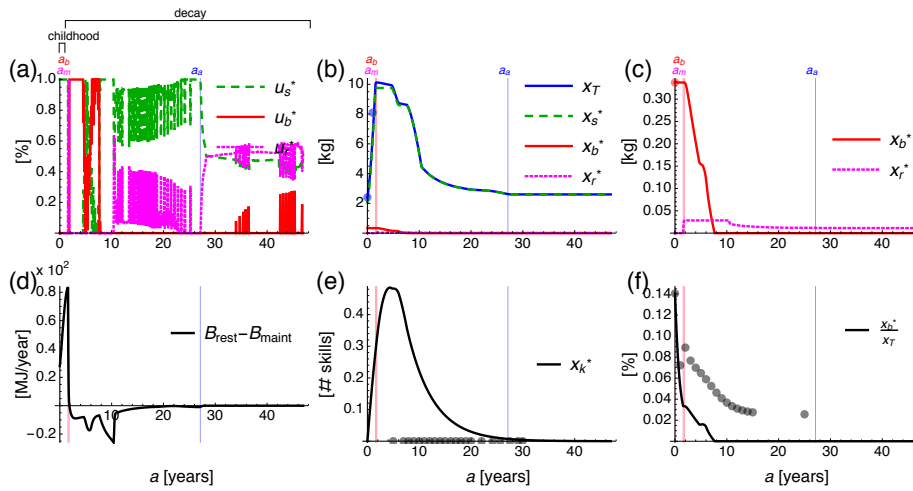

424

425 Figure S12: Reproduction without substantial growth with exponential competence when the environment is  
 426 exceedingly challenging. Parameters are as in Fig. 1e-h, except that here  $\alpha = 1.5$  rather than 1.15. The mass  
 427 of reproductive tissue grows from 0 kg at birth, to 0.77 g at the age of  $a_m \approx 6$  months, and reaches a peak of  
 428 4.64 g at  $a_b \approx 8$  months. Jitter in the controls indicates that the optimal control problem is computationally  
 429 challenging for GPOPS (this applies to all plots in the main paper and SI).

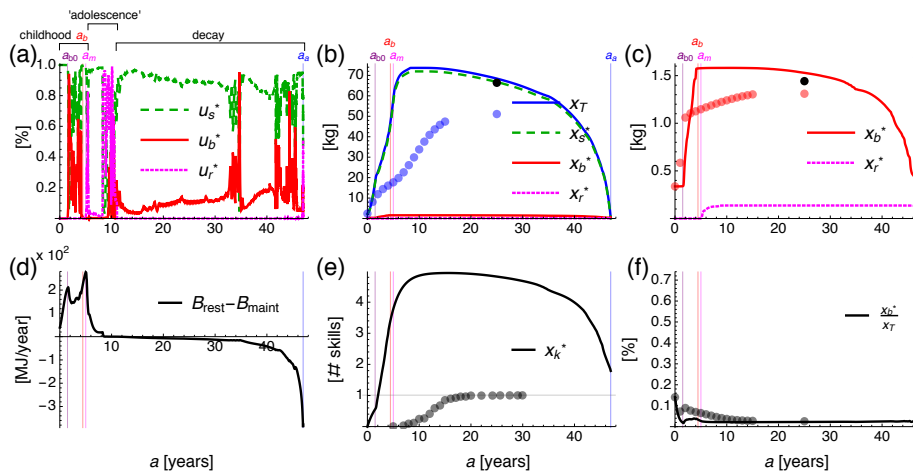

430

431 Figure S13: Brain and body collapse in adulthood with exponential competence when learning is exceedingly  
 432 inexpensive. Parameters are as in Fig. 1e-h, except that here  $E_k = 100$  MJ/skill rather than 250 MJ/skill.

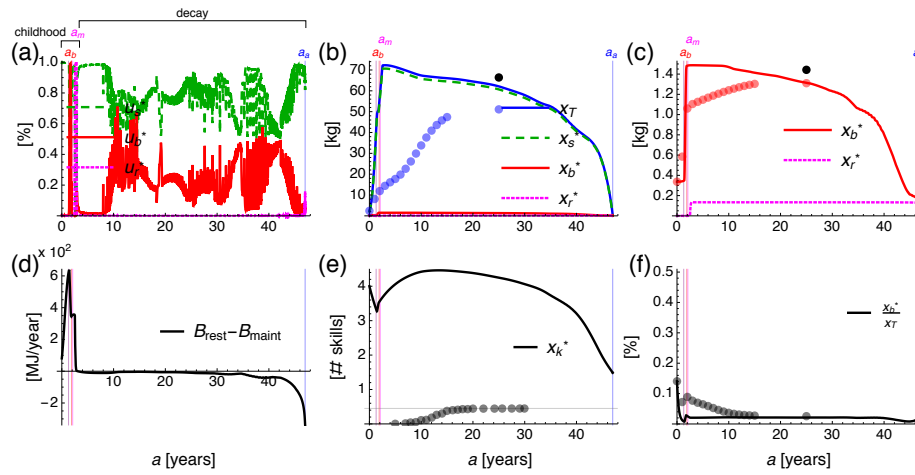

433

434 Figure S14: Brain and body collapse with exponential competence when the newborn has overly many skills.

435 Parameters are as in Fig. 1e-h, except that here  $x_k(0) = 4$  skills rather than 0.



436 **7.7 A large brain is also favored by small metabolic costs of learning, few innate skills,**  
 437 **and intermediate allocation of brain metabolic rate to skills**

438 When varying the learning cost, adult brain mass is largest when learning is inexpensive but not exceedingly  
 439 so (Fig. S15a). If learning is exceedingly inexpensive, the individual acquires enough skills while receiving  
 440 (allo)parental care that it grows more than what it can maintain when (allo)parental care is absent. In this case,  
 441 brain and body collapse during adulthood (Fig. S13). Otherwise, if learning is inexpensive but not exceedingly  
 442 so, brain and body grow to levels that the individual can maintain when (allo)parental care is absent. With  
 443 further increasingly expensive learning, skills grow more slowly and thus there is less growth metabolic rate at  
 444 each age, yielding a decreasing adult brain mass (Fig. S15a). Yet, while small learning costs favor a larger adult  
 445 brain mass, they also favor a larger adult body mass. Consequently, EQ is invariant with learning costs within  
 446 the range of brain and body growth (Fig. S15d).

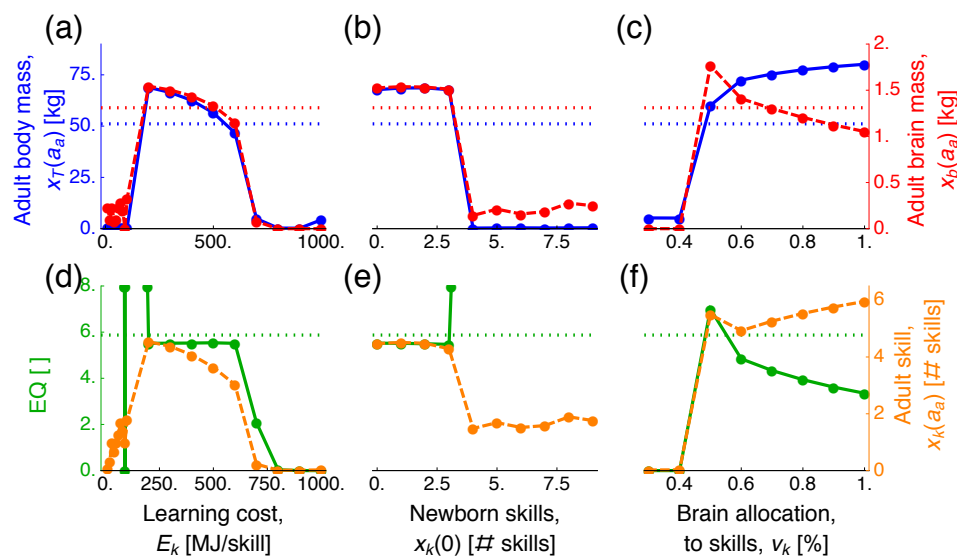

447

448 Figure S15: Predicted adult body and brain mass, EQ, and skill vs. other parameter values with exponential  
 449 competence. See legend of Fig. 3. In d, jitter in EQ is due to increasing jittering in the controls when body and  
 450 brain mass collapse.

451 When varying newborn skills, a larger adult brain mass is predicted when the newborn has fewer skills  
 452 (Fig. S15b). If the newborn has overly many skills, the individual grows more during the (allo)parental care  
 453 period than what it can maintain when (allo)parental care is absent, causing brain and body collapse during  
 454 adulthood (Figs. S15b and S14).

455 Regarding allocation of brain metabolic rate to energy-extraction skills, brain mass is predicted to be larger  
 456 with a decreasing, but not exceedingly, small brain allocation to skills (Fig. S15c). With an exceedingly small  
 457 brain allocation to skills, the individual reproduces without substantial growth because skills grow little and  
 458 the individual is unable to support itself when (allo)parental care becomes absent. Above a threshold, an  
 459 increasing brain allocation to skills predicts a decreasing adult brain mass because the energetic input to skill  
 460 growth is larger without the brain having to be as large [equation (A2)]. In contrast to brain mass and EQ, the  
 461 predicted adult skill number increases with brain allocation to skills (Fig. S15f).

462 Comparative predictions with power competence are similar to those with exponential competence (Fig.  
463 S16).

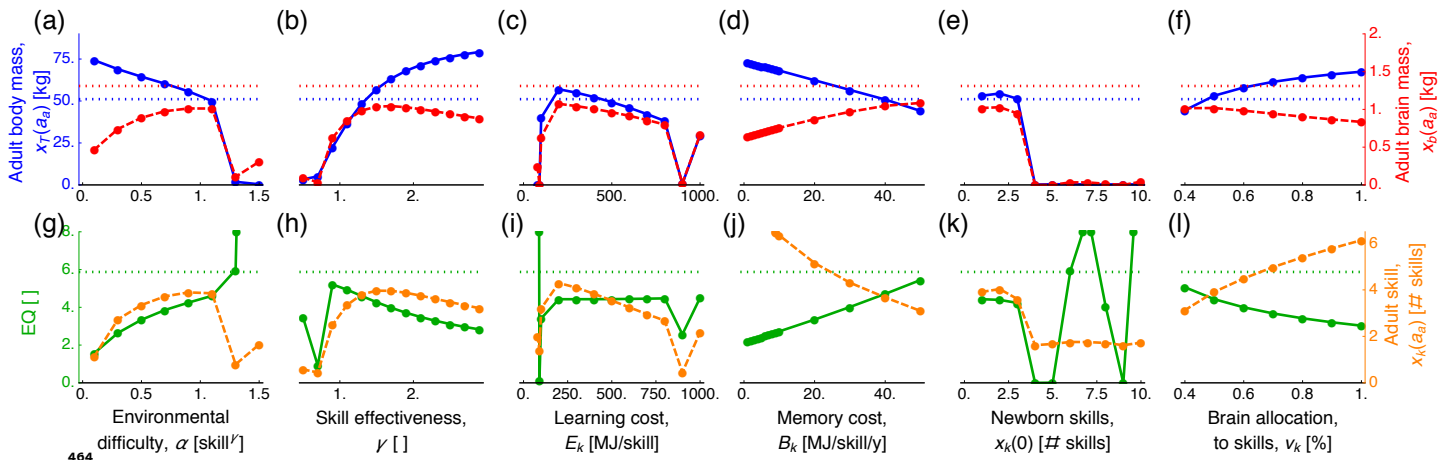

465 Figure S16: Predicted comparative patterns with power competence. See legend of Fig. 3. Jitter in EQ is due to  
466 increasing jittering in the controls when body and brain mass collapse.

## 467 References

- 468 Abramczuk, J. and Sawicki, W. (1974). Variation in dry mass and volume of nonfertilized oocytes and blas-  
469 tomers of 1-, 2- and 4-celled mouse embryos. *J. Exp. Zool.*, **188**, 25–34.
- 470 Blaxter, K. (1989). *Energy Metabolism in Animals and Man*. Cambridge Univ. Press, Cambridge, UK.
- 471 Bryson, Jr., A.E. and Ho, Y.C. (1975). *Applied Optimal Control: Optimization, Estimation, and Control*. Taylor  
472 & Francis.
- 473 Dickey, R.P., Taylor, S.N., Lu, P.Y., Sartor, B.M., Rye, P.H. and Pyrzak, R. (2002). Effect of diagnosis, age, sperm  
474 quality, and number of preovulatory follicles on the outcome of multiple cycles of clomiphene citrate-  
475 intrauterine insemination. *Reproductive Endocrinology*, **78**, 1088–1095.
- 476 Diehl, M., Bock, H.G., Diedam, H. and Wieber, P.B. (2006). Fast direct multiple shooting algorithms for optimal  
477 robot control. In *Fast motions in biomechanics and robotics*, pages 65–93. Springer, Berlin.
- 478 Dorfman, R. (1969). An economic interpretation of optimal control theory. *Am. Econ. Rev.*, **59**, 817–831.
- 479 Eaton, S.B., Pike, M.C., Short, R.V., Lee, N.C., Trussell, J., Hatcher, R.A. et al (1994). Women's reproductive  
480 cancers in evolutionary context. *Q. Rev. Biol.*, **69**, 353–367.
- 481 Goyal, M.S., Hawrylycz, M., Miller, J.A., Snyder, A.Z. and Raichle, M.E. (2014). Aerobic glycolysis in the human  
482 brain is associated with development and neotenus gene expression. *Cell Metab.*, **19**, 49–57.
- 483 Gurven, M. and Kaplan, H. (2007). Longevity among hunter-gatherers: a cross-cultural examination. *Popul.*  
484 *Dev. Rev.*, **33**, 321–365.

- 485 Hou, C., Zuo, W., Moses, M.E., Woodruff, W.H., Brown, J.H. and West, G.B. (2008). Energy uptake and allocation  
486 during ontogeny. *Science*, **322**, 736–739.
- 487 Irie, T. and Iwasa, Y. (2005). Optimal growth pattern of defensive organs: the diversity of shell growth among  
488 mollusks. *Am. Nat.*, **165**, 238–249.
- 489 Iwasa, Y. and Roughgarden, J. (1984). Shoot/root balance of plants: optimal growth of a system with many  
490 vegetative organs. *Theor. Popul. Biol.*, **25**, 78–105.
- 491 Kamien, M.I. and Schwartz, N.L. (2012). *Dynamic Optimization*. Dover, Mineola, NY, 2nd edition.
- 492 Kelley, H.J., Kopp, R.E. and Moyer, H.G. (1967). Singular extremals. In G. Leitmann, editor, *Topics in Optimiza-*  
493 *tion*, pages 63–101. Academic Press, New York.
- 494 King, D. and Roughgarden, J. (1982). Graded allocation between vegetative and reproductive growth for annual  
495 plants in growing seasons for random length. *Theor. Popul. Biol.*, **22**, 1–16.
- 496 Kleiber, M. (1932). Body size and metabolism. *Hilgardia*, **6**, 315–351.
- 497 Kleiber, M. (1961). *The Fire of Life*. Wiley.
- 498 Kozłowski, J. (1992). Optimal allocation of resources to growth and reproduction: implications for age and size  
499 at maturity. *Trends Ecol. Evol.*, **7**, 15–19.
- 500 Kuzawa, C.W., Chugani, H.T., Grossman, L.I., Lipovich, L., Muzik, O., Hof, P.R. et al (2014). Metabolic costs and  
501 evolutionary implications of human brain development. *Proc. Nat. Acad. Sci. USA*, **111**, 13010–13015.
- 502 Lande, R. (1982). A quantitative genetic theory of life history evolution. *Ecology*, **63**, 607–615.
- 503 Magnusson, C., Hillensjö, T., Hamberger, L. and Nilsson, L. (1986). Oxygen consumption by human oocytes  
504 and blastocysts grown in vitro. *Hum. Reprod.*, **1**, 183–184.
- 505 McGee, E.A. and Hsueh, A.J.W. (2000). Initial and cyclic recruitment of ovarian follicles. *Endocrine Reviews*, **21**,  
506 200–214.
- 507 Moses, M.E., Hou, C., Woodruff, W.H., West, G.B., Nekola, J.C., Zuo, W. et al (2008). Revisiting a model of  
508 ontogenetic growth: estimating model parameters from theory and data. *Am. Nat.*, **171**, 632–645.
- 509 Mylius, S.D. and Diekmann, O. (1995). On evolutionarily stable life histories, optimization and the need to be  
510 specific about density dependence. *Oikos*, **74**, 218–224.
- 511 O’Herlihy, C., De Crespigny, L.C., Lopata, A., Johnston, I., Houtt, I. and Robinson, H. (1980). Preovulatory  
512 follicular size: a comparison of ultrasound and laparoscopic measurements. *Fertil. Steril.*, **34**, 24–26.
- 513 Patterson, M.A. and Rao, A.V. (2014). GPOPS-II: A MATLAB software for solving multiple-phase optimal control  
514 problems using hp-adaptive gaussian quadrature collocation methods and sparse nonlinear programming.  
515 *ACM Trans. Math. Softw.*, **41**, 1–37.
- 516 Perrin, N. (1992). Optimal resource allocation and the marginal value of organs. *Am. Nat.*, **139**, 1344–1369.

- 517 Peters, R.H. (1983). *The Ecological Implications of Body Size*. Cambridge Univ. Press, Cambridge, UK.
- 518 Schmidt-Nielsen, K. (1984). *Scaling*. Cambridge Univ. Press.
- 519 Schniter, E., Gurven, M., Kaplan, H.S., Wilcox, N.T. and Hooper, P.L. (2015). Skill ontogeny among Tsimane  
520 forager-horticulturalists. *Am. J. Phys. Anthropol.*, **158**, 3–18.
- 521 Sears, K.E., Kerkhoff, A.J., Messerman, A. and Itagaki, H. (2012). Ontogenetic scaling of metabolism, growth,  
522 and assimilation: Testing metabolic scaling theory with *Manduca sexta* larvae. *Physiol. Biochem. Zool.*, **85**,  
523 159–173.
- 524 Sydsæter, K., Hammond, P., Seierstad, A. and Strom, A. (2008). *Further Mathematics for Economic Analysis*.  
525 Prentice Hall, 2nd edition.
- 526 West, G.B., Brown, J.H. and Enquist, B.J. (2001). A general model for ontogenetic growth. *Nature*, **413**, 628–631.
- 527 Ziółko, M. and Kozłowski, J. (1983). Evolution of body size: an optimization model. *Math. Biosci.*, **64**, 127–143.
